23 Yat-sen University, 58 Zhongshan Road II Guangzhou 510080 China; Tel.: +86 20 8775

24 5766x8282; fax: +86 20 8733 5935. E-mail: peizhong@mail.sysu.edu.cn

25 \*Correspondence to: Yue Lan, Department of Rehabilitation Medicine, Guangzhou

26 First People's Hospital, the Second Affiliated Hospital, South China University of

27 Technology, 1 Panfu Road, Guangzhou 510180 China. Tel: +86 189 889 919 16; E-mail:

28 bluemooning@163.com

29

30

31

32

33

34

35

36

37

38

39

#### 40 **Abstract**

41 The glymphatic system contributes to a large proportion of brain waste clearance,

42 including removal of amyloid  $\beta$  ( $A\beta$ ). We have demonstrated that glutamate and

43  $\gamma$ -aminobutyric acid (GABA) influence glymphatic clearance through distinct

44 mechanisms whereby GABA exerts modulatory effects in an aquaporin-4

45 (AQP4)-dependent manner while the actions of glutamate are pulsation-dependent. The

46 efficacy of GABA and glutamate in alleviating A $\beta$  in APP-PS1 and Angiotensin-II  
47 (Ang-II)-induced hypertension mouse models was further evaluated. Notably, increasing  
48 GABA or inhibiting glutamate levels led to reduced binding of A $\beta$  to pre-labeled plaques  
49 to similar extents in APP-PS1 mice while GABA appeared more efficient in A $\beta$  clearance  
50 in hypertensive animals than the glutamate inhibitor. Our findings support the modulation  
51 of neurotransmitters that influence the glymphatic pathway via distinct mechanisms as a  
52 potentially effective therapeutic strategy for clearance of A $\beta$  deposits from the brain.

53 **Keywords:** brain; pulsation; aquaporin-4; Glutamate; GABA; waste removal

## 54 **Introduction**

55  $\beta$ -Amyloid (A $\beta$ ) accumulation is one of the pathological hallmarks of Alzheimer's  
56 disease (AD). Both genetic and environmental factors are involved in AD development.  
57 Earlier studies have provided substantial evidence supporting an important role of  
58 environmental factors, such as hypertension, in the development of sporadic AD<sup>1</sup>.  
59 Cerebral blood vessels provide major A $\beta$  clearance routes from the brain. Hypertension  
60 disrupts the normal function of cerebral blood vessels, promoting vascular A $\beta$  deposition,  
61 which, in turn, impairs vessel function, forming a vicious circle and eventually leads to  
62 cognitive dysfunction<sup>2,3</sup>.

63 In the CNS, A $\beta$  is released from neurons into brain interstitial fluid (ISF). Recently,  
64 the glymphatic system and dural lymphatic vessels have been proposed as major  
65 extracellular disposal routes of A $\beta$ <sup>4-7</sup>.

66 Neurotransmitters play an important role in the pathogenesis of AD. A $\beta$  is reported to  
67 disrupt synaptic transmission of different neurotransmitters<sup>8-11</sup>, leading to cognitive  
68 decline. Several pre-clinical and clinical studies have demonstrated that modulation of  
69 neurotransmitter systems by memantine (NMDA receptor antagonist) and etazolate  
70 (GABA-A receptor agonist) can effectively alleviate accumulation of A $\beta$ <sup>12,13</sup>. Interestingly,  
71 neurotransmitters are also involved in modulation of glymphatic clearance. For example,  
72 previous studies have shown that noradrenaline mediates glymphatic transport in that  
73 convective exchange is increased in the presence of adrenergic antagonists, resulting in  
74 faster clearance of A $\beta$ <sup>14</sup>. Glutamate and GABA are major stimulatory and inhibitory  
75 neurotransmitters in the CNS, respectively. However, their potential roles in the

76 glymphatic system are yet to be established. Aquaporin-4 (AQP4) and arterial pulsation  
77 are two main driving forces in the glymphatic pathway<sup>4,15</sup>. The GABA-A receptor  
78 co-localizes with AQP4 in brain tissue<sup>16,17</sup>. In addition, glutamate has been shown to  
79 influence vascular smooth muscle cell function, which is associated with pulsation<sup>18</sup>. In  
80 the current study, we tested the hypothesis that glutamate and GABA play important roles  
81 in glymphatic pathway clearance through modulation of pulsation or AQP4. Improper  
82 function of these neurotransmitters may differentially contribute to clearance failure of  
83 A $\beta$ .

84

## 85 **METHODS**

### 86 **Animals.**

87 C57BL/6J male mice (6–8 weeks, 12–16 weeks and 8 months) were provided by the  
88 Sun Yat-sen University Medical Experimental Animal Center (Guangzhou, China).  
89 AQP4-deleted male mice (AQP4<sup>-/-</sup>) 6–8 weeks of age were a gift from the Jiangsu Key  
90 Laboratory of Neurodegeneration (Nanjing Medical University, Nanjing, China). Male  
91 APP<sup>swe</sup>/PS1<sup>dE9</sup> (APP/PS1) mice 7–8 months old were purchased from Guangdong  
92 Medical Experimental Animal Center. AQP4<sup>-/-</sup> and APP-PS1 mice were both backcrossed  
93 onto a C57BL/6J background. All animals were kept in temperature- and  
94 humidity-controlled rooms under a 12 h/12 h light/dark cycle. Sample size was selected  
95 according to previously published reports. Experimental procedures were performed in  
96 accordance with the guidelines imposed by Sun Yat-sen University Committee on the  
97 Care and Use of Animals.

98 **Reagents and Antibodies.**

99 FITC-dextran 70 kDa (Sigma, FD4, USA) was used to trace CSF movement, and  
100 FITC-dextran 2000 kDa (Sigma, FD2000S, USA) and Rhodamine B-dextran 70 kDa  
101 (Sigma, R9379, USA) to label vasculature. All reagents were dissolved in artificial CSF  
102 (ACSF) at a concentration of 1%. Neurotransmitter agonists/antagonists, including  
103 glutamate (Sigma, G3291, USA), NMDA receptor antagonist,  
104 2-amino-5-phosphonovaleric acid (APV) (Sigma, A8054, USA), AMPA/kainate receptor  
105 antagonist 6-Cyano-7-nitroquinoxaline-2, 3-dione (CNQX) (Sigma, C127, USA), GABA  
106 (Sigma, A2129, USA), GABA-A receptor antagonist and Bicuculline (Bic) (Sigma,  
107 285269, USA), were dissolved in CSF tracer before use at a concentration of 0.2 mM.  
108 Evans Blue (Sigma, E2129, USA) dissolved in saline was used to label lymph node  
109 drainage. Angiotensin-II (Bechem, H-1705, Torrance, USA) was employed to induce  
110 hypertension. Fluorescent-labeled A $\beta$  peptides (Anaspec, 60492-01, Fremont, USA) and  
111 FSB (Millipore, 344101, Darmstadt, Germany) were used to examine A $\beta$  binding. To  
112 label amyloid plaques, antibodies specific for A $\beta$  1-42 (Biolegend, 805501, San Diego,  
113 USA) and A $\beta$  1-40 (Biolegend, 805401, USA) were employed. Antibodies for Collagen-I  
114 (Co-I) (Abcam, ab34710, Hong Kong, UK) and  $\alpha$ -smooth muscle actin (SMA) (Boster,  
115 BM0002, Wuhan, China) were used to test vascular structure changes and those for AQP4  
116 (Alomone Labs, 300-314, Jerusalem, Israel) and GFAP (Millipore, 2642205, USA) to  
117 detect aquaporin and astrocytes, respectively. All secondary antibodies were purchased  
118 from Cell Signaling Technology (4408, 4409, 4412, 4413, Carlsbad, USA).

119 **Intra-cisternal and interstitial tracer injection.**

120 Mice were anesthetized with an intraperitoneal injection of 1% pentobarbital (50  
121 mg/kg) and positioned in a stereotaxic frame (RWD Life Science company, Shenzhen,  
122 China). A microsyringe (BASi, West Lafayette, USA) was inserted into the cisterna  
123 magna (i.c.v.), and 10  $\mu$ l CSF tracer injected at a speed of 0.2  $\mu$ l/min. For interstitial  
124 injection, micro glass pipettes filled with 1  $\mu$ l CSF tracer was connected to a  
125 microinjection system (BASi, USA). Under a two-photon microscope, the pipette was  
126 inserted into the cortex under 200  $\mu$ m and the solution infused at a velocity of 0.2  $\mu$ l/min.

127 ***In vivo* two-photon imaging of glymphatic pathway clearance.**

128 A  $2 \times 2 \text{ mm}^2$  cranial window was prepared over the right parietal cortex (2 mm caudal  
129 from bregma, 1.7 mm lateral from the midline) with a micro-drill and a metal plate glued  
130 at the edge of the cranial window<sup>16,17</sup>. The mouse was fixed on the stage of two-photon  
131 microscope (Leica, DM6000, Wetzlar, Germany). ACSF was perfused during the whole  
132 surgical procedure to keep the cranial window moist. Throughout the experiment, body  
133 temperatures were kept constant at 36.8°C with a feedback-controlled heating pad (RWD  
134 Life Science Company, Shenzhen, China). To visualize vasculature, 0.2 ml Rhodamine  
135 B-dextran 70 kDa was injected intravenously before imaging. A Leica NA 0.95 together  
136 with a 25 $\times$  magnification water-immersion objective was used at an excitation wavelength  
137 of 800 nm. The cerebral vasculature was initially imaged with  $512 \times 512$ -pixel frames  
138 from the surface to a depth of 200  $\mu$ m with 2  $\mu$ m z-steps. Tracer movement was detected  
139 with dual channels. Imaging panels 100  $\mu$ m below the cortical surface were selected for  
140 analysis of tracer movement into the paravascular space with Leica Lite software. For  
141 paravascular and interstitial movement, circular regions of interest (ROI) 25 pixels in

142 diameter were centered on the surrounding penetrating arterioles. To define tracer  
143 movement into brain tissue, the distribution of CSF tracers in three-dimensional (3D)  
144 vectorized reconstruction was analyzed. Mean pixel intensities within these ROIs and 3D  
145 reconstructions were measured at 5 min intervals. For interstitial clearance, mean  
146 fluorescence of CSF tracers was measured at 15 min intervals.

#### 147 **Evans blue injection and quantification.**

148 With careful separation of muscle and anadesma in the back, the cisterna magna was  
149 exposed. In total, 5  $\mu$ l of 10% Evans blue (Sigma, E2129) was slowly injected into the  
150 cisterna magna at a rate of about 1  $\mu$ l/min over 5 min. After 30 min, deep cervical lymph  
151 nodes (dcLNs) were dissected for assessment of Evans blue content. The intensity of  
152 Evans blue was measured using confocal microscopy, and the same capture parameters  
153 maintained during intensity detection.

#### 154 **Pulsation measurement.**

155 Pulsation measurements were conducted as previous experiment described<sup>15</sup>. X-T  
156 line scan technology was used to measure pulsation. Scans of 2000 ms (0.5 ms per line)  
157 were acquired orthogonal to the vessel axis in different vessel types, including surface  
158 arteries, surface veins, penetrating arteries and penetrating veins. Vessel fluorescence was  
159 extracted from X-T plots and plotted in relation to time using Graphpad prism 6.0.  
160 Pulsatility was calculated as standard deviation of the percentage of mean values.

#### 161 **Unilateral internal carotid artery ligation**

162 Unilateral internal carotid artery ligation was performed as previous experiment  
163 described<sup>15</sup>. The right common, internal, and external carotid arteries were surgically



164 isolated. The internal carotid was ligated by 5-0 silk suture.

165 **Murine models of hypertension.**

166 Hypertension mouse models were generated by Angiotensin-II (1000 ng/kg/min)  
167 infusion using osmotic pumps (DURECT, Alzet model 2004), which were implanted  
168 subcutaneously in 12–16 weeks-old C57Bl/6 mice for 28 days. Assessment of Ang-II  
169 amounts was performed according to previous reports<sup>19</sup>. Blood pressure was measured  
170 with the tail cuff method every week. Mouse models without hypertension were  
171 discounted.

172 ***In vivo* two-photon time-lapse imaging of A $\beta$  binding.**

173 Mice received FSB injection (I.P. 7.5 mg/kg) two days prior to the experiment.  
174 Anesthesia and craniotomy were performed in keeping with previous protocols.  
175 Microglass pipettes filled with 1  $\mu$ l A $\beta$ -555 peptide solution were connected to a  
176 microinjection system (BASi, USA). A $\beta$ 40-555 were used among hypertension groups  
177 and A $\beta$ 42 555 were used among APP/PS1 groups. Under a two-photon microscope, the  
178 pipette was inserted into the cortex and the solution infused at a velocity of 0.2  $\mu$ l/min. *In*  
179 *vivo* two-photon imaging of the binding process was conducted about 200  $\mu$ m away from  
180 the pipette tip with a 20 $\times$  water immersion objective. A $\beta$ 40/42-555 and FSB were excited  
181 at 920 nm and 800 nm, respectively. The recording time was 10 min with 30 s per frame.  
182 For administration of the GABA, APV and CNQX, drugs were dissolved in a CSF at a  
183 final concentration of 10  $\mu$ M in 10  $\mu$ l and injected into the cisternal at the velocity of  
184 1 $\mu$ l/min.

185 **Immunofluorescence.**

186 Immunofluorescence analysis was conducted on 10  $\mu$ m paraformaldehyde  
187 (PFA)-fixed frozen sections. Slices were blocked for 1 h at room temperature with normal  
188 goat serum and 0.3% Triton and incubated overnight with primary antibody at 4°C,  
189 followed by secondary antibody for 1 h at room temperature. Slices were stained with  
190 DAPI (F6057, Sigma, USA) and immunofluorescence images observed under a confocal  
191 microscope (Leica, DM6000, Wetzlar, Germany).

## 192 **Statistical analysis.**

193 Data were analyzed with SPSS Statistics 20 and GraphPad Prism 6.0 and presented as  
194 mean  $\pm$  s.e.m or mean  $\pm$  S.D. Different treatment groups were evaluated using one-way  
195 ANOVA with LSD test or two-way ANOVA with Tukey's test for multiple comparisons to  
196 determine differences among individual groups. The unpaired t-test was used when  
197 comparing two individual groups. A probability of  $p < 0.05$  was indicative of significant  
198 differences between groups. Regardless of the method used, the results were equivalent in  
199 magnitude and statistically significant. Data from all statistical analyses are presented in  
200 Supplementary Table 1.

201

## 202 **RESULTS**

### 203 **GABA promotes while glutamate suppresses glymphatic clearance**

204 To explore the roles of GABA and glutamate in glymphatic pathway clearance, specific  
205 agonists/antagonists for these neurotransmitters dissolved in CSF tracer were injected into  
206 the cisterna magna (Fig. 1e). Cerebral vasculature was labeled with 70 kDa Rhodamine B,  
207 which allows visualization of arteries based on blood flow direction and morphology.

208 Measurements were taken 5 min after infusion when the fluorescent tracer could be  
209 stably visualized. The tracer rapidly entered the cortex through the paravascular spaces  
210 surrounding the surface along penetrating arteries but was absent in venules at the  
211 beginning (Fig. 1a–d). To quantitatively evaluate the movement of para-arterial CSF  
212 tracer, mean fluorescence intensity (ROI) was measured at 100  $\mu\text{m}$  below the cortical  
213 surface over 30 min with intervals of 5 min (Fig. 1b). During the measurements, mean  
214 fluorescence intensity in the sham group increased constantly up to ~300% at 30 min (Fig.  
215 2a-c). A large proportion of para-arterial CSF tracer gradually fluxed into this space.  
216 Interestingly, glutamate significantly inhibited paravascular penetration (Glutamate vs.  
217 vehicle, two-way ANOVA, for interaction factor,  $P < 0.001$ ) while both the GABA<sub>A</sub>  
218 receptor agonist and antagonist had no effect on paravascular movement (GABA vs.  
219 vehicle, two-way ANOVA, for interaction factor,  $P = 0.6027$ ; bicuculline vs. vehicle,  
220 two-way ANOVA, for interaction factor,  $P = 0.2211$ ) (Fig 2b). The neurotransmitter  
221 glutamate has two major ionotropic receptors (NMDA and AMPA/kainate receptors),  
222 which are widespread in the cerebral cortex and other brain regions. Notably, upon  
223 separate blockage of these two receptors, APV (NMDA receptor antagonist) significantly  
224 accelerated paravascular movement (APV vs. vehicle, two-way ANOVA, for interaction  
225 factor,  $P < 0.001$ ) whereas CNQX (AMPA/kainate receptor antagonist) had no effect  
226 (CNQX vs. vehicle, two-way ANOVA, for interaction factor,  $P = 0.9303$ ). Since water and  
227 small solutes freely enter the brain interstitium from paravascular spaces via bulk flow, we  
228 additionally analyzed tracer influx into the surrounding interstitium via 3D vectorized  
229 reconstruction of tracer distribution in the parenchyma (Fig. 2b–c). The mean

230 fluorescence intensity in the sham group increased to ~3.0-fold at 30 min, indicating  
231 influx of tracer from the paravascular space. As expected, glutamate reduced CSF tracer  
232 penetration into the interstitium (Glutamate vs. vehicle, two-way ANOVA, for interaction  
233 factor,  $P<0.001$ ) (Fig. 2d). Unexpectedly, APV and CNQX robustly accelerated tracer  
234 influx into parenchyma (APV vs. vehicle, two-way ANOVA, for interaction factor,  
235  $P=0.1346$ ; CNQX vs. vehicle, two-way ANOVA, for interaction factor,  $P<0.001$ ) (Fig.  
236 2d). Moreover, GABA induced marked enhancement whereas bicuculline (GABA<sub>A</sub>  
237 receptor antagonist) led to significant inhibition of influx (GABA vs. vehicle, two-way  
238 ANOVA, for interaction factor,  $P<0.05$ ; bicuculline vs. vehicle, two-way ANOVA, for  
239 interaction factor,  $P<0.001$ ) (Fig. 2e). Therefore, our results suggest that glutamate slows  
240 paravascular movement though the NMDA receptor and inhibits tracer influx into the  
241 parenchyma though the AMPA/kainate receptor. GABA, which did not influence  
242 paravascular movement, accelerated tracer influx into the parenchyma.

243 In the glymphatic pathway, CSF enters the brain interstitium though paravascular  
244 movement and interstitial fluid in parenchyma is subsequently cleared from paravenous  
245 routes. To further explore the role of neurotransmitters in modulating interstitial fluid  
246 clearance, CSF tracers were injected directly into brain parenchyma 150-200  $\mu\text{m}$  below  
247 the skull surface and two-photon imaging of tracer clearance performed over 60 minutes  
248 with intervals of 15 minutes (Fig. 3a). The mean fluorescence intensity in the region of  
249 interest (ROI) at 200  $\mu\text{m}$  below the cortical surface was measured to quantify interstitial  
250 fluid clearance. Following injection, mean fluorescence intensity in the vehicle group  
251 constantly decreased and was reduced by ~60% at 60 minutes (Fig. 3b, c). Notably,

252 glutamate strongly inhibited while CNQX significantly accelerated interstitial fluid  
253 clearance (glutamate vs. vehicle, two-way ANOVA, for interaction factor,  $P<0.001$ ;  
254 CNQX vs. vehicle, two-way ANOVA, for interaction factor,  $P<0.001$ ). However, APV did  
255 not promote interstitial fluid clearance (APV vs. vehicle, two-way ANOVA, for  
256 interaction factor,  $P=0.6069$ ). In contrast, GABA greatly promoted whereas bicuculline  
257 robustly inhibited interstitial fluid clearance (GABA vs. vehicle, two-way ANOVA, for  
258 interaction factor,  $P<0.001$ ; bicuculline vs. vehicle, two-way ANOVA, for interaction  
259 factor,  $P<0.01$ ) (Fig. 3b, c). Based on these findings, we concluded that glutamate impairs  
260 interstitial fluid clearance though the AMPA/kainate receptor and GABA facilitated  
261 drainage.

262 Interstitial solutes are ultimately cleared into peripheral lymph nodes outside the brain  
263 parenchyma. Accordingly, we injected Evans blue i.c.v. and examined for the presence of  
264 the dye in deep cervical lymph nodes (dcLNs) in animals receiving different treatments.  
265 Consistent with previous findings, Evans blue was detected in dcLNs 30 min after  
266 injection. Mean fluorescence of Evans blue in lymph nodes was analyzed for each group  
267 (Fig. 3e). Unexpectedly, Evans blue staining was barely detectable in dcLNs of animals  
268 receiving glutamate (Fig. 3b) but evident in lymph nodes of animals receiving APV and  
269 CNQX, respectively (Glutamate vs. vehicle,  $t=9.976$ ,  $P<0.001$ ; APV vs. vehicle,  $t=8.737$ ,  
270  $P<0.001$ ; CNQX vs. vehicle,  $t=6.811$ ,  $P<0.001$ ) (Fig. 3d), suggesting that a  
271 glutamate-related clearance mechanism is involved in this drainage route of cerebrospinal  
272 fluid (CSF). Consistently, GABA accelerated whereas bicuculline inhibited ultimate  
273 drainage of the tracer dye (GABA vs. vehicle,  $t=5.27$ ,  $P<0.001$ ; bicuculline vs. vehicle,

274  $t=10.85$ ,  $P<0.001$ ) (Fig. 3e). Our findings suggest that glutamate and GABA modulate  
275 drainage of interstitial fluid from the parenchyma via distinct routes. Based on the  
276 collective findings, we propose that glutamate and GABA play opposite roles in CSF  
277 tracer movement. Specifically, glutamate inhibits paravascular movement through the  
278 NMDA receptor and facilitates interstitial fluid clearance through the AMPA/kainate  
279 receptor while GABA does not influence paravascular movement but accelerates  
280 interstitial fluid drainage.

281 **Glutamate-mediated inhibition of paravascular movement through the NMDA receptor**  
282 **is pulsation-dependent**

283 Paravascular movement of CSF is reported to be driven by arterial pulsation. Our previous  
284 experiments showed that glutamate inhibits paravascular movement through the NMDA  
285 receptor. Accordingly, we proposed that glutamate-mediated inhibition of paravascular  
286 movement was pulsation-dependent.

287 To further examine this hypothesis, two-photon line scanning to visualize pulsation was  
288 performed. Vascular pulsatility was measured at different levels of the cerebrovascular  
289 tree, specifically, surface arteries, penetrating arteries, ascending veins and surface veins  
290 (Fig. 4a). In the vehicle group, penetrating arteries and ascending veins showed  
291 significantly higher pulsatility, compared with surface arteries and veins (Fig. 4b, c).  
292 Upon administration of glutamate and its antagonist (i.c.v.), glutamate strongly inhibited  
293 whereas APV promoted pulsatility among surface and penetrating arteries (Among  
294 surface arteries, Glutamate vs. vehicle,  $t=6.498$ ,  $P<0.001$ ; APV vs. vehicle,  $t=5.613$ ,  
295  $P<0.001$ ; among penetrating arteries, Glutamate vs. vehicle,  $t=6.437$ ,  $P<0.001$ ; APV vs.

296 vehicle,  $t=13.400$ ,  $P<0.001$ ) (Fig. 4d). However, CNQX, GABA, and bicuculline had no  
297 significant influence on pulsatility (Fig. 4e). We concluded from this experiment that  
298 glutamate reduced pulsatility through the NMDA receptor while GABA did not influence  
299 pulsatility.

300 Based on pulsatility measurements, we further reduced cerebral arterial pulsatility by  
301 unilateral ligation of the internal carotid artery and injected the CSF tracer (i.c.v.), which  
302 dissolves glutamate and the GABA agonist/antagonist. After arterial ligation, we observed  
303 significantly reduced pulsatility in the vehicle group (Fig. 5b). Moreover, administration  
304 of glutamate and GABA agonist/antagonist failed to induce significant changes in  
305 pulsatility (Fig. 5c). Next, we quantified paravascular tracer movement 100  $\mu\text{m}$  below the  
306 cortex surface as described previously. The vehicle group showed markedly slower  
307 paravascular movement after arterial ligation (Fig. 5a). Moreover, glutamate and APV  
308 failed to either inhibit or facilitate paravascular movement (Glutamate vs. vehicle,  
309 two-way ANOVA, for interaction factor,  $P=0.3392$ ; APV vs. vehicle, two-way ANOVA,  
310 for interaction factor,  $P=0.2709$ ) (Fig. 5b). Meanwhile, administration of CNQX, GABA,  
311 and bicuculline did not lead to significant changes in paravascular movement, compared  
312 with the vehicle group (CNQX vs. vehicle, two-way ANOVA, for interaction factor,  
313  $P=0.4799$ ; GABA vs. vehicle, two-way ANOVA, for interaction factor,  $P=0.8563$ ;  
314 bicuculline vs. vehicle, two-way ANOVA, for interaction factor,  $P=0.9873$ ) (Fig. 5c). The  
315 mean fluorescence intensity in parenchyma was additionally measured. The vehicle group  
316 showed markedly slower tracer accumulation in parenchyma (Fig. 5d, e). However,  
317 glutamate and APV groups displayed almost no CSF tracer penetration into parenchyma

318 (Glutamate vs. vehicle, two-way ANOVA, for interaction factor,  $P=0.9991$ ; APV vs.  
319 vehicle, two-way ANOVA, for interaction factor,  $P=0.9693$ ) (Fig. 5d). Interestingly,  
320 GABA and CNQX remarkably facilitated tracer influx (GABA vs. vehicle, two-way  
321 ANOVA, for interaction factor,  $P<0.001$ ; CNQX vs. vehicle, two-way ANOVA, for  
322 interaction factor,  $P<0.05$ ) (Fig. 5e).

323 These two experiments further confirmed that glutamate inhibits paravascular  
324 movement through the NMDA receptor in a pulsation-dependent manner while GABA  
325 has no significant influence on this process.

326 **The influence of Glutamate and GABA on tracer penetration into parenchyma is**  
327 **AQP4-dependent.**

328 Paravascular movement of CSF and ISF is reported to be driven by arterial pulsation  
329 and facilitated by an astroglial AQP4 water channel. Given that GABA and glutamate  
330 inhibitor accelerated paravascular clearance to significant extents but had distinct effects on  
331 dcLN drainage, we propose that AQP4 influences GABA and glutamate activities in  
332 different ways.

333 Initially, AQP4 knockout mice were employed to determine whether GABA and glutamate  
334 participate in AQP4-dependent clearance (Fig. 6a). Fluorescence in the paravascular space  
335 was slowly increased in AQP4-null mice (Fig. 6b, c), accompanied by little influx into the  
336 interstitium (Fig. 6d and e), indicating obvious blockage of para-arterial and interstitium  
337 exchange. Glutamate did not influence draining of the tracer into the para-vascular space  
338 while APV restored impaired paravascular movement in AQP4-null animals to a remarkable  
339 extent (Glutamate vs. vehicle, two-way ANOVA, for interaction factor,  $P=0.9875$ ; APV vs.



340 vehicle, two-way ANOVA, for interaction factor,  $P < 0.05$ ) (Fig. 6b). CNQX, GABA, and  
341 bicuculline did not alter paravascular movement relative to the vehicle group (CNQX vs.  
342 vehicle, two-way ANOVA, for interaction factor,  $P = 0.8122$ ; GABA vs. vehicle, two-way  
343 ANOVA, for interaction factor,  $P = 0.6682$ ; Bicuculline vs. vehicle, two-way ANOVA, for  
344 interaction factor,  $P = 0.8934$ ) (Fig. 6c). Glutamate almost impaired tracer influx with nearly  
345 no penetration of fluorescence into the parenchyma and CNQX failed to facilitate tracer  
346 penetration into the parenchyma. APV accelerated paravascular movement but did not  
347 promote tracer penetration into the parenchyma (Glutamate vs. vehicle, two-way ANOVA,  
348 for interaction factor,  $P = 0.6300$ ; CNQX vs. vehicle, two-way ANOVA, for interaction factor,  
349  $P = 0.3194$ ; APV vs. vehicle, two-way ANOVA, for interaction factor,  $P = 0.5353$ ) (Fig. 6d).  
350 Moreover, GABA and bicuculline did not alter the dynamic pattern of the fluorescent signal  
351 in parenchyma (GABA vs. vehicle, two-way ANOVA, for interaction factor,  $P = 0.4193$ ;  
352 Bicuculline vs. vehicle, two-way ANOVA, for interaction factor,  $P = 0.2425$ ;) (Fig. 6e).

353       Based on the collective data, we concluded that glutamate inhibited paravascular  
354 movement through the NMDA receptor, which was pulsation-dependent, and suppressed  
355 tracer penetration into the parenchyma and interstitial fluid drainage through the  
356 AMPA/kainate receptor which was AQP4-dependent. GABA did not appear to influence  
357 paravascular movement but accelerated glymphatic clearance in an AQP4-dependent  
358 manner.

### 359 **Hypertension impairs glymphatic clearance of A $\beta$ through reduction of arterial** 360 **pulsation**

361       Given that glymphatic clearance of interstitial solutes is highly dependent on vascular

362 pulsatility, we hypothesized that hypertension influences pulsatility, in turn, impairing  
363 lymphatic clearance. The Ang-II hypertension model was applied to test this theory. After  
364 chronic infusion of Ang-II for 28 days, mice displayed a marked increase in systolic blood  
365 pressure (SBP) and diastolic blood pressure (DBP), compared to vehicle-infused mice  
366 (Fig. 7g, h) (vehicle vs. hypertension, for SBP,  $t=4.429$ ,  $P<0.01$ , for DBP,  $t=5.326$ ,  
367  $P<0.001$ ). As expected, pulsatility was significantly reduced among surface/penetrating  
368 artery and surface/ascending veins (hypertension vs. vehicle, for surface artery,  $t=5.485$ ,  
369  $P<0.001$ ; for penetrating artery,  $t=4.263$ ,  $P<0.01$ ; for surface vein,  $t=12.320$ ,  $P<0.001$ ; for  
370 ascending vein,  $t=5.257$ ,  $P<0.001$ ) (Fig. 7s) in parallel with glymphatic clearance  
371 impairment (hypertension vs. vehicle, for paravascular movement, two-way ANOVA, for  
372 interaction factor,  $P<0.05$ ; for interstitial movement, two-way ANOVA, for interaction  
373 factor,  $P<0.001$ ) (Fig. 7k-m) and obvious enlargement of Virchow-Robin Space (VRS)  
374 around the arteries (Fig. 7e). Moreover, we observed no significant differences in GFAP  
375 expression and AQP4 polarization (Fig. 7q, t, u). To examine cerebral A $\beta$  deposition *in*  
376 *vivo*, we performed two-photon imaging of fibrillar amyloid plaques pre-labeled with the  
377 fluorescent fibrillar amyloid-binding dye, FSB, while simultaneously labeling cerebral  
378 vessels with Rhodamine B. *In vivo* imaging revealed significant A $\beta$  deposition on cerebral  
379 vessel walls, and to some extent, in surrounding tissues (Fig. 7a-d). This finding was in  
380 keeping with the strong staining observed for A $\beta$  1–40 and weak staining for A $\beta$  1–42  
381 (Fig. 7p, lower panel). The vehicle group displayed no cerebral FSB-positive amyloid  
382 plaques or A $\beta$  staining. Moreover, severe cerebrovascular warp (Fig. 7f) and collagen  
383 deposition (vehicle vs. hypertension, for collagen staining,  $P<0.05$ ) (Fig. 7p, r) were

384 detected in hypertensive animals, indicating that hypertension induces substantial changes  
385 in vascular structure.

386 **Impairment of glymphatic clearance is associated with A $\beta$  plaque deposition in**  
387 **APP-PS1 mice**

388 Two-photon imaging revealed fibrillar amyloid plaques in the parenchyma, but no  
389 evidence of CAA in 7–8-month-old APP-PS1 mice (Fig. 8a), consistent with strongly  
390 positive A $\beta$  1–42 and negative A $\beta$  1–40 immunofluorescence staining in slices (Fig. 8b).  
391 APP-PS1 mice showed significant impairment of glymphatic clearance as indicated by  
392 normal paravascular movement but little influx into the interstitium (APP-PS1 vs. WT,  
393 two-way ANOVA, for paravascular movement, for interaction factor,  $P=0.2461$ ; for  
394 interstitial movement, for interaction factor,  $P<0.001$ ) (Fig. 8d and e), similar to that in  
395 AQP4<sup>-/-</sup> mice. Despite no distinct changes in pulsatility in APP-PS1 mice, increased  
396 number of GFAP-positive astrocytes and impaired AQP4 polarization were observed,  
397 compared with age-matched WT mice (APP-PS1 vs. WT, for GFAP expression,  $t=7.527$ ,  
398  $P<0.001$ ; for AQP4 polarization, among large vessels,  $t=4.215$ ,  $P<0.01$ ; among small  
399 vessels,  $t=0.9817$ ,  $P=0.1372$ ) (Fig. 8f-i), indicating that inflammatory responses are  
400 activated in the APP-PS1 group that influence the function of AQP4.

401 **Inhibition of glutamate and increase in GABA differentially affect soluble A $\beta$**   
402 **binding to pre-existing plaques in APP-PS1 and hypertension models**

403 Previously, a method for microinjection of soluble A $\beta$  was developed to assess A $\beta$   
404 binding ability in the brain. Condello and colleagues<sup>20</sup> showed that A $\beta$ 40–555 infusions  
405 led to homogeneous binding to amyloid plaques, indicating a direct correlation between

406 soluble A $\beta$  clearance and total binding quantity. We employed this method to examine the  
407 roles of glutamate and GABA in glymphatic clearance of soluble A $\beta$  in FAD and  
408 hypertension models. Consistently, soluble A $\beta$  microinjected into the parenchyma (Fig. 9b)  
409 diffused throughout the hemisphere and rapidly bound to FSB-labeled fibrillar plaques  
410 within 10 min (Fig. 9a). After the administration of neurotransmitter into the cisternal,  
411 GABA, APV and CNQX inhibited the binding process. Notably, we observed nearly no  
412 soluble A $\beta$  binding to FSB-labeled plaques 10 min after administration of GABA, APV  
413 and CNQX in both FAD and hypertension models (two-way ANOVA, APP-PS1 vs.  
414 GABA, for interaction factor,  $P < 0.001$ ; APP-PS1 vs. APV, for interaction factor,  $P < 0.001$ ;  
415 APP-PS1 vs. CNQX, for interaction factor,  $P < 0.001$ ; hypertension vs. GABA, for  
416 interaction factor,  $P < 0.001$ ; hypertension vs. APV, for interaction factor,  $P < 0.001$ ;  
417 hypertension vs. CNQX, for interaction factor,  $P < 0.001$ .), supporting the theory that  
418 inhibition of glutamate or activation of GABA induces rapid clearance of soluble A $\beta$  (Fig.  
419 9c and d).

## 420 **Discussion**

421 In this study, we have examined the roles of two main neurotransmitters, GABA and  
422 glutamate, in modulation of the glymphatic clearance of A $\beta$ . Our experiments suggest that  
423 these two neurotransmitters exert opposite effects on glymphatic clearance through  
424 distinct pathways. GABA enhanced glymphatic clearance in an AQP4-dependent manner  
425 while glutamate suppressed clearance in a manner dependent on arterial pulsation and  
426 AQP4 though distinctive receptors.

427 Arterial pulsation is a main driving force for solute movement in the brain. For

428 example, cerebral arterial pulsation can drive paravascular CSF-interstitial fluid  
429 exchange<sup>15</sup>. In addition, arterial pulsation facilitates the exit of ISF solutes in the opposite  
430 direction to blood flow along cerebral arteries<sup>21</sup>. In the present study, GABA, APV and  
431 CNQX were shown to promote glymphatic clearance. Interestingly, however, APV  
432 accelerated paravascular movement, but not GABA or CNQX. In addition, APV promoted  
433 clearance of fluorescent tracers in the para-arterial space in AQP4-deleted mice,  
434 suggesting that enhancement of glymphatic clearance by APV was not dependent on  
435 AQP4 and was more likely acts on blood vessels. Indeed, glutamate is reported to  
436 constrict pial arterioles whereas inhibition of glutamate by an ionotropic receptor  
437 antagonist dilates arterioles<sup>18</sup>. Because APV and CNQX are both ionotropic receptor  
438 antagonists, the issue of why APV but not CNQX promotes paravascular movement of  
439 fluorescent tracers was unclear. One possible explanation was that endothelial cells  
440 expressed NMDA but not AMPA/kainate. Activation of endothelial NMDA could increase  
441 Ca<sup>2+</sup> influx, which, in turn, reduced pulsatility.

442 The involvement of AQP4 in solute movement in the brain has been well  
443 established<sup>4,6,22</sup>. Consistent with previous observations, significant reduction of interstitial  
444 clearance was evident in AQP4<sup>-/-</sup> mice. CNQX-mediated interstitial clearance was  
445 proposed to rely heavily on AQP4, in view of the finding that increase in glymphatic  
446 clearance was abolished in AQP4<sup>-/-</sup> mice. Although astrocytes expressed ionotropic  
447 receptors, including AMPA/kainate and NMDA, only AMPA was widely expressed in  
448 many brain regions and has been confirmed to act as a fully functional receptor. The  
449 AMPA receptor functions through mediation of calcium and sodium influx in astrocytic

450 processes<sup>23</sup>. However, the mechanism underlying AQP4 involvement in CNQX-mediated  
451 clearance is currently unclear. This process may be mediated indirectly because no direct  
452 interactions have been detected between AMPA and AQP4. Glutamate exerts depolarizing  
453 effects on astrocytes through ion influx. Upon depolarization of astrocytes, molecules  
454 such as AQP4 that normally localize in endfoot membranes are redistributed to  
455 non-endfoot membranes, thereby compromising AQP4 function<sup>24</sup>. By inhibiting ion influx,  
456 CNQX may therefore counteract glutamate-mediated astroglial depolarization to maintain  
457 AQP4 in perivascular endfeet.

458       Unlike glutamate, GABA had no effect on pulsation. Inhibition of GABA by the  
459 GABA<sub>A</sub> receptor antagonist, bicuculline, led to a considerable decrease in glymphatic  
460 clearance. GABA enhanced glymphatic clearance in wild-type but not AQP4<sup>-/-</sup> mice,  
461 indicating that GABA-mediated clearance was AQP4-dependent. Earlier studies  
462 suggested that the GABA receptor co-localizes with AQP4<sup>16,25</sup>. Further research is  
463 warranted to ascertain whether direct interactions between GABA and AQP4 promote  
464 glymphatic clearance.

465       Failure to clear A $\beta$  deposits is linked to a number of A $\beta$ -associated diseases, such as  
466 FAD and hypertension<sup>8,26,27</sup>. However, brain distribution of A $\beta$  is variable among different  
467 diseases<sup>28</sup>. For example, A $\beta$  mainly localizes in brain parenchyma in AD but is deposited  
468 along arteries in hypertension<sup>1,3,19</sup>. These findings highlighted the complexity of the  
469 mechanisms underlying failure of A $\beta$  deposit clearance. Accordingly, we further explored  
470 the potential roles of glutamate and GABA neurotransmitters in clearance of A $\beta$  deposits  
471 in FAD and hypertension.

472 Transgenic APP/PS1 mice, a commonly used model of AD, can generate substantial  
473 amounts of  $\beta$ -amyloid. Consistent with previous observations, significant levels of  $A\beta$   
474 were deposited in the parenchyma in APP/PS1 mice. Similar to AQP4<sup>-/-</sup> mice, APP-PS1  
475 mice exhibited marked impairment of glymphatic clearance, specifically, an increase in  
476 paravascular fluorescence but little influx into the interstitium. While no significant  
477 alterations in pulsatility were observed, AQP4 polarization was remarkably impaired and  
478 GFAP expression increased in APP-PS1 mice. These findings may explain the impaired  
479 interstitium clearance in APP-PS1 mice and shed further light on the mechanisms  
480 underlying  $A\beta$  deposition in Alzheimer's disease patients.

481 Hypertension is a strong risk factor for age-related dementia that is characterized by  
482 both beta amyloid ( $A\beta$ ) deposition and vascular dysfunction<sup>3</sup>. Consistently,  $A\beta$  deposition  
483 was evident in Ang- $\square$  induced hypertensive animals as well as glymphatic clearance  
484 impairment. In parallel, pulsatility was significantly decreased whereas the GFAP and  
485 AQP4 levels remained unchanged. Thus, the hypertension-induced decrease in arterial  
486 pulsation was possibly responsible for  $A\beta$  deposition. Interestingly, GABA, APV and  
487 CNQX promoted rapid clearance of soluble  $A\beta$  in both FAD and hypertension models,  
488 supporting the theory that modulation of neurotransmitters may serve as an effective  
489 therapeutic strategy for removal of  $A\beta$  deposits in the brain. However, it should be noted  
490 that CNQX was less effective than GABA in soluble  $A\beta$  clearance in the hypertension  
491 model, which may be attributable to differences in their mechanisms of action. Unlike  
492 GABA, CNQX does not interact directly with AQP4.

493 Our study had a number of limitations that need to be addressed. Previous reports

494 suggest that A $\beta$  can be removed from the brain via various clearance systems (most  
495 importantly, the blood–brain barrier (BBB)). As the glymphatic pathway flushes A $\beta$   
496 towards the perivascular space, which may influence clearance through BBB<sup>1,15,28</sup>, the  
497 issue of whether GABA and glutamate modulate BBB permeability or act via interactions  
498 with receptors for advanced glycation end products (RAGE) or low density  
499 receptor-related protein-1 (LRP1) requires further investigation.

500 In conclusion, the neurotransmitters glutamate and GABA exerted distinct  
501 modulatory effects on glymphatic clearance. The collective data from our study presented  
502 novel insights into the mechanisms underlying A $\beta$  drainage that may be effectively  
503 applied for treatment of Alzheimer’s disease and hypertension.

504

## 505 **References**

- 506 1. Carnevale, D. & Lembo, G. ‘Alzheimer-like’ pathology in a murine model of arterial hypertension.  
507 *Biochemical Society Transactions* **39**, 939-944 (2011).
- 508 2. Bueche, C.Z., *et al.* Hypertension drives parenchymal  $\beta$ -amyloid accumulation in the brain  
509 parenchyma. *Annals of Clinical and Translational Neurology* **1**, 124-129 (2014).
- 510 3. Carnevale, D., *et al.* HYPERTENSION INDUCES BRAIN  $\beta$ -AMYLOID ACCUMULATION, COGNITIVE  
511 IMPAIRMENT AND MEMORY DETERIORATION THROUGH ACTIVATION OF RAGE IN BRAIN  
512 VASCULATURE. *Hypertension* **60**, 188-197 (2012).
- 513 4. Iliff, J.J., *et al.* A Paravascular Pathway Facilitates CSF Flow Through the Brain Parenchyma and the  
514 Clearance of Interstitial Solutes, Including Amyloid  $\beta$ . *Science translational medicine* **4**,  
515 147ra111-147ra111 (2012).
- 516 5. Aspelund, A., *et al.* A dural lymphatic vascular system that drains brain interstitial fluid and  
517 macromolecules. *The Journal of Experimental Medicine* **212**, 991 (2015).
- 518 6. Louveau, A., *et al.* Structural and functional features of central nervous system lymphatics. *Nature*  
519 **523**, 337-341 (2015).
- 520 7. Iliff, J.J. & Nedergaard, M. Is there a cerebral lymphatic system? *Stroke; a journal of cerebral*  
521 *circulation* **44**, S93-S95 (2013).
- 522 8. Hascup, K.N. & Hascup, E.R. Altered neurotransmission prior to cognitive decline in AbetaPP/PS1  
523 mice, a model of Alzheimer’s disease. *J Alzheimers Dis* **44**, 771-776 (2015).
- 524 9. Ulrich, D. Amyloid- $\beta$  Impairs Synaptic Inhibition via GABA<sub>A</sub> Receptor  
525 Endocytosis. *The Journal of Neuroscience* **35**, 9205 (2015).



- 526 10. Abbas, G., Mahmood, W. & Kabir, N. Recent progress on the role of GABAergic neurotransmission  
527 in the pathogenesis of Alzheimer's disease. in *Reviews in the Neurosciences*, Vol. 27 449 (2016).
- 528 11. Rodriguez-Perdigon, M., *et al.* Down-regulation of glutamatergic terminals (VGLUT1) driven by A $\beta$   
529 in Alzheimer's disease. *Hippocampus* **26**, 1303-1312 (2016).
- 530 12. Parsons, C.G., Danysz, W., Dekundy, A. & Pulte, I. Memantine and Cholinesterase Inhibitors:  
531 Complementary Mechanisms in the Treatment of Alzheimer's Disease. *Neurotoxicity Research* **24**,  
532 358-369 (2013).
- 533 13. Li, Y., *et al.* Implications of GABAergic Neurotransmission in Alzheimer's Disease. *Frontiers in Aging*  
534 *Neuroscience* **8**, 31 (2016).
- 535 14. Xie, L., *et al.* Sleep Drives Metabolite Clearance from the Adult Brain. *Science (New York, N.Y.)* **342**,  
536 10.1126/science.1241224 (2013).
- 537 15. Iliff, J.J., *et al.* Cerebral Arterial Pulsation Drives Paravascular CSF-Interstitial Fluid Exchange in the  
538 Murine Brain. *The Journal of Neuroscience* **33**, 18190 (2013).
- 539 16. Jarius, S., Aktas, O. & Wildemann, B. Gamma-aminobutyric acid receptor agonists, aquaporin-4,  
540 and neuromyelitis optica: a potential link. *Medical Hypotheses* **85**, 628-630 (2015).
- 541 17. Li, Y., *et al.* GABAAR Regulates AQP4 Expression in the Subependymal Zone: Relevance to Neural  
542 Precursors and Water Exchange, (2014).
- 543 18. Mori, A., Hanada, M., Sakamoto, K., Nakahara, T. & Ishii, K. Impaired retinal vasodilator response  
544 to acetylcholine in a rat model of NMDA-induced retinal degeneration. *Journal of Pharmacological*  
545 *Sciences* **127**, 211-216 (2015).
- 546 19. Lu, H., *et al.* Subcutaneous Angiotensin II Infusion using Osmotic Pumps Induces Aortic Aneurysms  
547 in Mice. *Journal of Visualized Experiments : JoVE*, 53191 (2015).
- 548 20. Condello, C., Yuan, P., Schain, A. & Grutzendler, J. Microglia constitute a barrier that prevents  
549 neurotoxic protofibrillar A $\beta$ 42 hotspots around plaques. *Nature communications* **6**, 6176-6176  
550 (2015).
- 551 21. Schley, D., Carare-Nnadi, R., Please, C.P., Perry, V.H. & Weller, R.O. Mechanisms to explain the  
552 reverse perivascular transport of solutes out of the brain. *Journal of Theoretical Biology* **238**,  
553 962-974 (2006).
- 554 22. Iliff, J.J., *et al.* Impairment of Glymphatic Pathway Function Promotes Tau Pathology after  
555 Traumatic Brain Injury. *The Journal of Neuroscience* **34**, 16180 (2014).
- 556 23. Droste, D., *et al.* Ca(2+)-permeable AMPA receptors in mouse olfactory bulb astrocytes. *Sci Rep* **7**,  
557 44817 (2017).
- 558 24. Gunnarson, E., *et al.* Identification of a molecular target for glutamate regulation of astrocyte  
559 water permeability. *Glia* **56**, 587-596 (2008).
- 560 25. Li, Y., *et al.*  $\gamma$ -Aminobutyric A Receptor (GABA(A)R) Regulates Aquaporin 4 Expression in the  
561 Subependymal Zone: RELEVANCE TO NEURAL PRECURSORS AND WATER EXCHANGE. *The Journal*  
562 *of Biological Chemistry* **290**, 4343-4355 (2015).
- 563 26. Tarasoff-Conway, J.M., *et al.* Clearance systems in the brain—implications for Alzheimer disease.  
564 *Nature reviews. Neurology* **11**, 457-470 (2015).
- 565 27. Peng, W., *et al.* Suppression of glymphatic fluid transport in a mouse model of Alzheimer's disease.  
566 *Neurobiology of disease* **93**, 215-225 (2016).
- 567 28. Keable, A., *et al.* Deposition of amyloid  $\beta$  in the walls of human leptomeningeal arteries in relation  
568 to perivascular drainage pathways in cerebral amyloid angiopathy(). *Biochimica et Biophysica Acta*

569           **1862**, 1037-1046 (2016).

570

571

572

573

574

575

576

577

578

579

580

581

582

583   **Acknowledgments**

584   This work was supported by grants from the National Natural Science Foundation of  
585   China (Grant Numbers: 81572224, 81572230, 81772438, and 81671102), The National  
586   Key Research and Development Program of China, Stem Cell and Translational Research  
587   (2017YFA0105104), Science and Technology Planning Project of Guangdong Province,  
588   China (Grant Numbers: 2016A020213003, 2016B030230002, and 2017A040406007),  
589   Science and Technology Planning Project of Guangzhou, China (Grant Number:  
590   2016201604030036), and the National Key Clinical Department, National Key Discipline,  
591   Guangdong Provincial Key Laboratory for Diagnosis and Treatment of Major  
592   Neurological Disease (Grant Numbers: 2014B030301035).

593

594   **Author contributions**

595 Yi-wei Feng, Qun Zhang, Xiao-fei He, Dong-xu Liu, Dan Wu, Ge Li, Cheng Wu and  
596 Feng-yin Liang performed the experiments. Yi-wei Feng, Qun Zhang and Xiao-fei He  
597 drafted the manuscript. Guang-qing Xu, Yue Lan and Zhong Pei conceived and designed  
598 the research. Zhong Pei and Guang-qing Xu edited and revised the manuscript.  
599 Guang-qing Xu, Yue Lan and Zhong Pei approved the final version of the manuscript.

600

#### 601 **Competing financial interests**

602 All authors declare no conflict of financial interests.

603

604

605

606

607

#### 608 **Figure legends**

609 **Fig. 1.** *In vivo* two-photon imaging of CSF tracer clearance through the glymphatic  
610 system. **(a–d)** *In vivo* imaging of CSF tracer movement along the surface **(a)** and  
611 penetrating arteries **(b)**. Cerebral vasculature was visualized with Rhodamine B (red).  
612 CSF tracer (green) moved along the paravascular space of arteries but not veins (A:  
613 surface artery; V: surface vein; PA: penetrating artery; PV: penetrating vein; Dark blue  
614 circles, arterioles; light blue circles, veins). Magnification of penetrating vessels **(c)** and  
615 **(d)**. **(e)** Schematic diagram of the imaging setup and intra-cisternal injection of the CSF  
616 tracer. **(f)** Schematic depiction of the glymphatic system. In this brain-wide pathway, CSF  
617 enters the brain along para-arterial routes and is cleared along paravenous routes. **(g–h)**  
618 3D reconstruction of distribution of the CSF tracer in brain at 10 and 30 min. The tracer

619 moved rapidly into the parenchyma over time.

620

621 **Fig. 2.** GABA promotes while glutamate suppresses glymphatic clearance. **(a)** *In vivo*  
622 two-photon imaging of tracer clearance through the para-vascular glymphatic pathway  
623 after intra-cisternal injection of GABA/glutamate and the respective antagonists. **(b, c)**  
624 Quantification of CSF tracer influx into the surrounding parenchyma via 3D  
625 reconstruction and paravascular CSF tracer clearance at 100  $\mu\text{m}$  below the cortical surface  
626 **(d, e)**. Glutamate strongly inhibited whereas APV accelerated paravascular movement. No  
627 significant changes in paravascular movement were observed in mice receiving GABA,  
628 bicuculline and CNQX. Glutamate inhibited penetration of the tracer into the interstitium.  
629 APV did not influence the dynamic pattern of tracer penetration while CNQX  
630 significantly promoted tracer influx. GABA promoted whereas bicuculline inhibited tracer  
631 influx to a significant extent (n=6 mice per group). Present and following data are  
632 presented as means  $\pm$  S.D. \* $P < 0.05$ , \*\* $P < 0.01$  and \*\*\* $P < 0.001$ .

633

634 **Fig. 3.** Glutamate inhibits while GABA accelerates ISF clearance. **(a)** *In vivo* two-photon  
635 imaging of tracer clearance in the interstitium after injection of tracer containing  
636 glutamate/GABA agonist/antagonist. **(b, c)** Quantification of mean tracer fluorescent  
637 changes in mice receiving glutamate/GABA agonist/antagonist. Glutamate significantly  
638 inhibited whereas CNQX accelerated tracer clearance. ISF clearance was promoted by  
639 GABA and conversely inhibited by bicuculline. **(e)** Representative fluorescent images of  
640 Evans blue staining indicative of drainage into dcLNs after injection of GABA/glutamate

641 and the respective antagonists. dcLNs in each group are magnified by 50×. **(d)**  
642 Quantification of dcLN fluorescence in each group. Glutamate significantly inhibited  
643 whereas CNQX and APV promoted drainage. Moreover, drainage was enhanced by  
644 GABA and inhibited by bicuculline (n=6 mice per group).

645

646 **Fig. 4.** Measurement of vascular pulsatility in mouse cortex. **(a)** Cortical surface arteries  
647 and veins and penetrating arteries and veins. X–T line scans (red lines) were generated  
648 orthogonal to the vessel axis. **(b)** Vascular pulsatility was defined as absolute changes in  
649 fluorescence values over 4000 ms with intervals of 0.5 ms. **(c)** Vascular pulsatility in  
650 cortical surface arteries (SA), penetrating arteries (PA), ascending veins (AV) and surface  
651 veins (SV). Pulsatility was greatest in penetrating arteries and veins, compared with  
652 surface vessels. **(d-e)** Analysis of pulsatility in different groups. Glutamate strongly  
653 inhibited whereas APV significantly accelerated pulsatility among surface and penetrating  
654 arteries. GABA and bicuculline did not affect pulsatility. **(f-g)** Analysis of pulsatility in  
655 different groups after deep cerebral artery ligation. Artery ligation abolished pulsatility  
656 changes by glutamate and APV (n=8-9 vessels per group).

657

658 **Fig. 5.** Glutamate inhibits paravascular movement through the NMDA receptor, which is  
659 pulsation-dependent. **(a)** *In vivo* two-photon imaging of tracer clearance through the  
660 para-vascular glymphatic pathway after intra-cisternal injection of GABA/glutamate and  
661 the respective antagonists. Deep cervical artery was unilaterally ligated during imaging.  
662 **(b, c)** Quantification of CSF tracer influx into the surrounding parenchyma via 3D

663 reconstruction and paravascular CSF tracer clearance at 100  $\mu\text{m}$  below the cortical surface  
664 **(d, e)**. After ligation, no significant differences were observed in mice receiving glutamate  
665 and GABA agonists/antagonists with regard to paravascular movement. CNQX and  
666 GABA significantly accelerated tracer penetration into the interstitium (n=5-6 mice per  
667 group)  
668

669 **Fig. 6.** Effects of Glutamate and GABA on tracer penetration into parenchyma are  
670 AQP4-dependent. **(a)** *In vivo* two-photon imaging of tracer clearance through the  
671 glymphatic pathway after intracisternal injection of GABA/glutamate and the respective  
672 antagonists in AQP4<sup>-/-</sup> mice. **(b, c)** Quantification of CSF tracer influx into the  
673 surrounding parenchyma via 3D reconstruction and paravascular CSF tracer clearance at  
674 100  $\mu\text{m}$  below the cortical surface **(d, e)**. APV strongly accelerated paravascular movement  
675 while no significant changes were observed in mice receiving glutamate and CNQX.  
676 GABA and bicuculline did not affect paravascular movement. No significant changes in  
677 tracer penetration into the interstitium were observed among the experimental groups,  
678 compared with the vehicle group (n=6 mice per group).  
679

680 **Fig. 7.** Hypertension induces brain A $\beta$  deposition and glymphatic clearance impairment.  
681 **(a-d)** *In vivo* imaging of A $\beta$  deposition in the cerebral cortex. A $\beta$  deposition (FSB, green)  
682 was distinct along the vessels. **(e)** Enlarged VRS were observed. **(f)** 3D reconstruction of  
683 the vasculature in hypertension mice. The warping vessel is magnified on the right panel.  
684 **(g-j)** Ang-II evoked a significant increase in systolic blood pressure (SBP) and diastolic

685 blood pressure (DBP) with no changes in heart rates (HR) and body weight (**k-m**).

686 Glymphatic clearance impairment was evident in hypertension models. (**n-o**) Arterial

687 diameters remained unchanged in hypertension models while vascular pulsatility was

688 severely reduced (n=8-9 vessels per group) (**s**). (**q**) Representative images of GFAP

689 expression and AQP4 polarization in the cortex. No distinctive changes in AQP4

690 polarization (**t**) and GFAP expression (**u**) were observed in the hypertension model. (**p**,

691 **upper panel**) Representative images of smooth muscle actin (SMA) and collagen

692 expression in the cortex. No significant changes in SMA expression (**r**) and greater

693 deposition of collagen (**r**) in vascular walls were observed in hypertension models. (**p**,

694 **lower panel**) Immunology of A $\beta$  1–40 and A $\beta$  1–42 in hypertension model mice.

695 Significant deposition of A $\beta$  1–40, but not A $\beta$  1–42, in vessels was observed. (**p**, **lower**

696 **panel**) Co-labeling of collagen and A $\beta$  1–40 in hypertension. A $\beta$  1–40 co-localized with

697 collagen (n=5-6 mice per group).

698

699 **Fig. 8.** Impairment of glymphatic clearance and deposition of A $\beta$  plaques in APP-PS1

700 mice. (**a**) *In vivo* imaging of A $\beta$  deposition in the cerebral cortex (FSB: green). A $\beta$

701 deposition was evident in the parenchyma with no distinct CAA. (**b**) Immunology of A $\beta$

702 1–40 and A $\beta$  1–42 in APP-PS1. Significant numbers of A $\beta$  1–42-labeled amyloid plaques

703 were observed in the parenchyma, but no marked deposition of A $\beta$  1–40. (**c**)

704 Representative images of paravascular CSF tracer clearance at 100  $\mu$ m below the cortical

705 surface in APP-PS1 indicating severe impairment in penetration of fluorescence tracer (**e**)

706 while no changes in paravascular movement was observed (**d**). (**h-i**) Expression of AQP4

707 and GFAP in cortex and hippocampus. Compared with WT control mice, APP-PS1 mice  
708 displayed significant decrease in AQP4 polarization and exhibited a marked increase in  
709 GFAP expression in the cortex (n=6 mice per group). No significant pulsatility changes  
710 were observed between APP-PS1 and WT control mice (**f**) (n=7-8 vessels per group).

711

712 **Fig. 9.** *In vivo* brain imaging of A $\beta$ 40–555 binding to existing A $\beta$  deposits. (**a**) High  
713 magnification of two-photon images of homogeneous binding of A $\beta$ 40–555 (green) to  
714 existing amyloid deposits pre-labeled with FSB (blue). (**b**) Schematic diagram of injection  
715 of A $\beta$ 40–555 into the cortex under a microscope. Quantification of co-labeling of A $\beta$ 40-555  
716 with pre-existing amyloid deposits following injection in hypertension (**c**) and APP-PS1 (**d**)  
717 mice. A $\beta$ 40–555 bound rapidly to pre-existing amyloid deposits and reached a plateau  
718 within 5 min (green curve). In the hypertension mouse model (**c**), APV, CNQX and GABA  
719 inhibited binding. However, the CNQX-treated group showed greater binding than the  
720 GABA-treated and APV-treated group at 540, 560 and 600 s. In APP-PS1 mice (**d**), APV,  
721 CNQX and GABA inhibited binding with no significant differences (n=5-6 mice per group).  
722



# Figure 1.

bioRxiv preprint doi: <https://doi.org/10.1101/2020.01.31.928481>; this version posted January 31, 2020. The copyright holder for this preprint (which was not certified by peer review) is the author/funder. All rights reserved. No reuse allowed without permission.

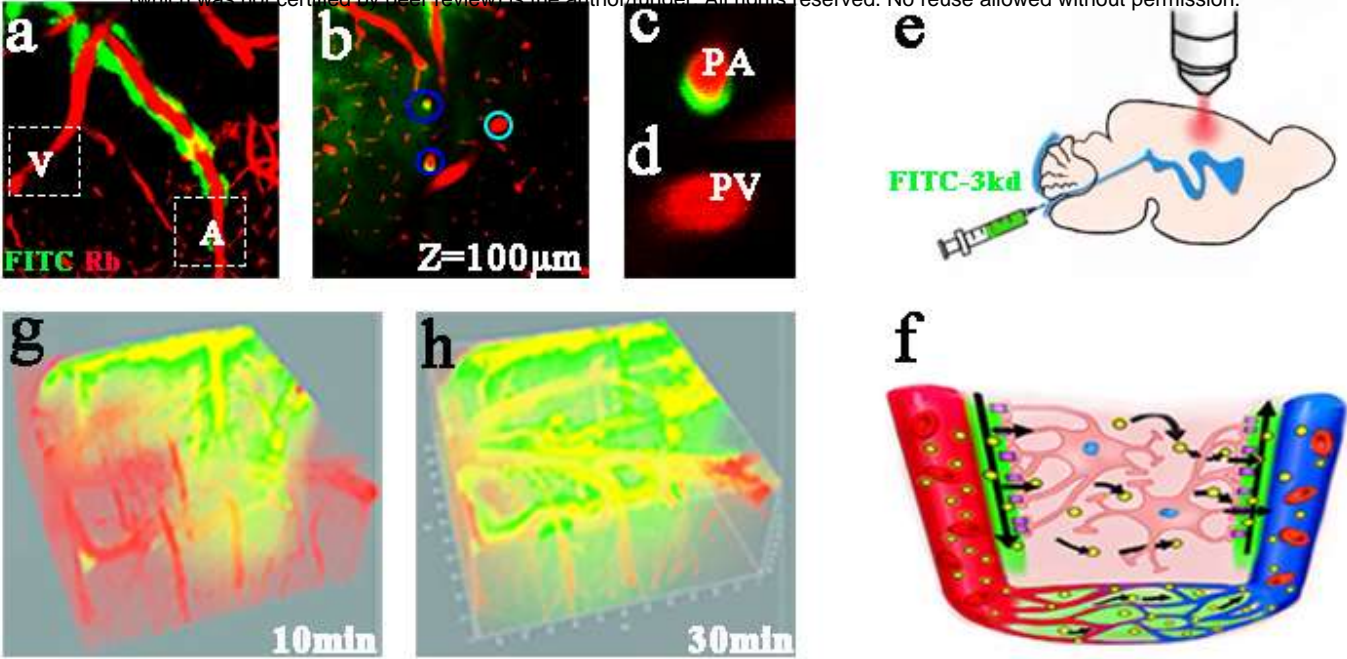

**Figure 2.**

bioRxiv preprint doi: <https://doi.org/10.1101/2020.01.31.928483>; this version posted February 11, 2020. The copyright holder for this preprint (which was not certified by peer review) is the author/funder. All rights reserved. No reuse allowed without permission.

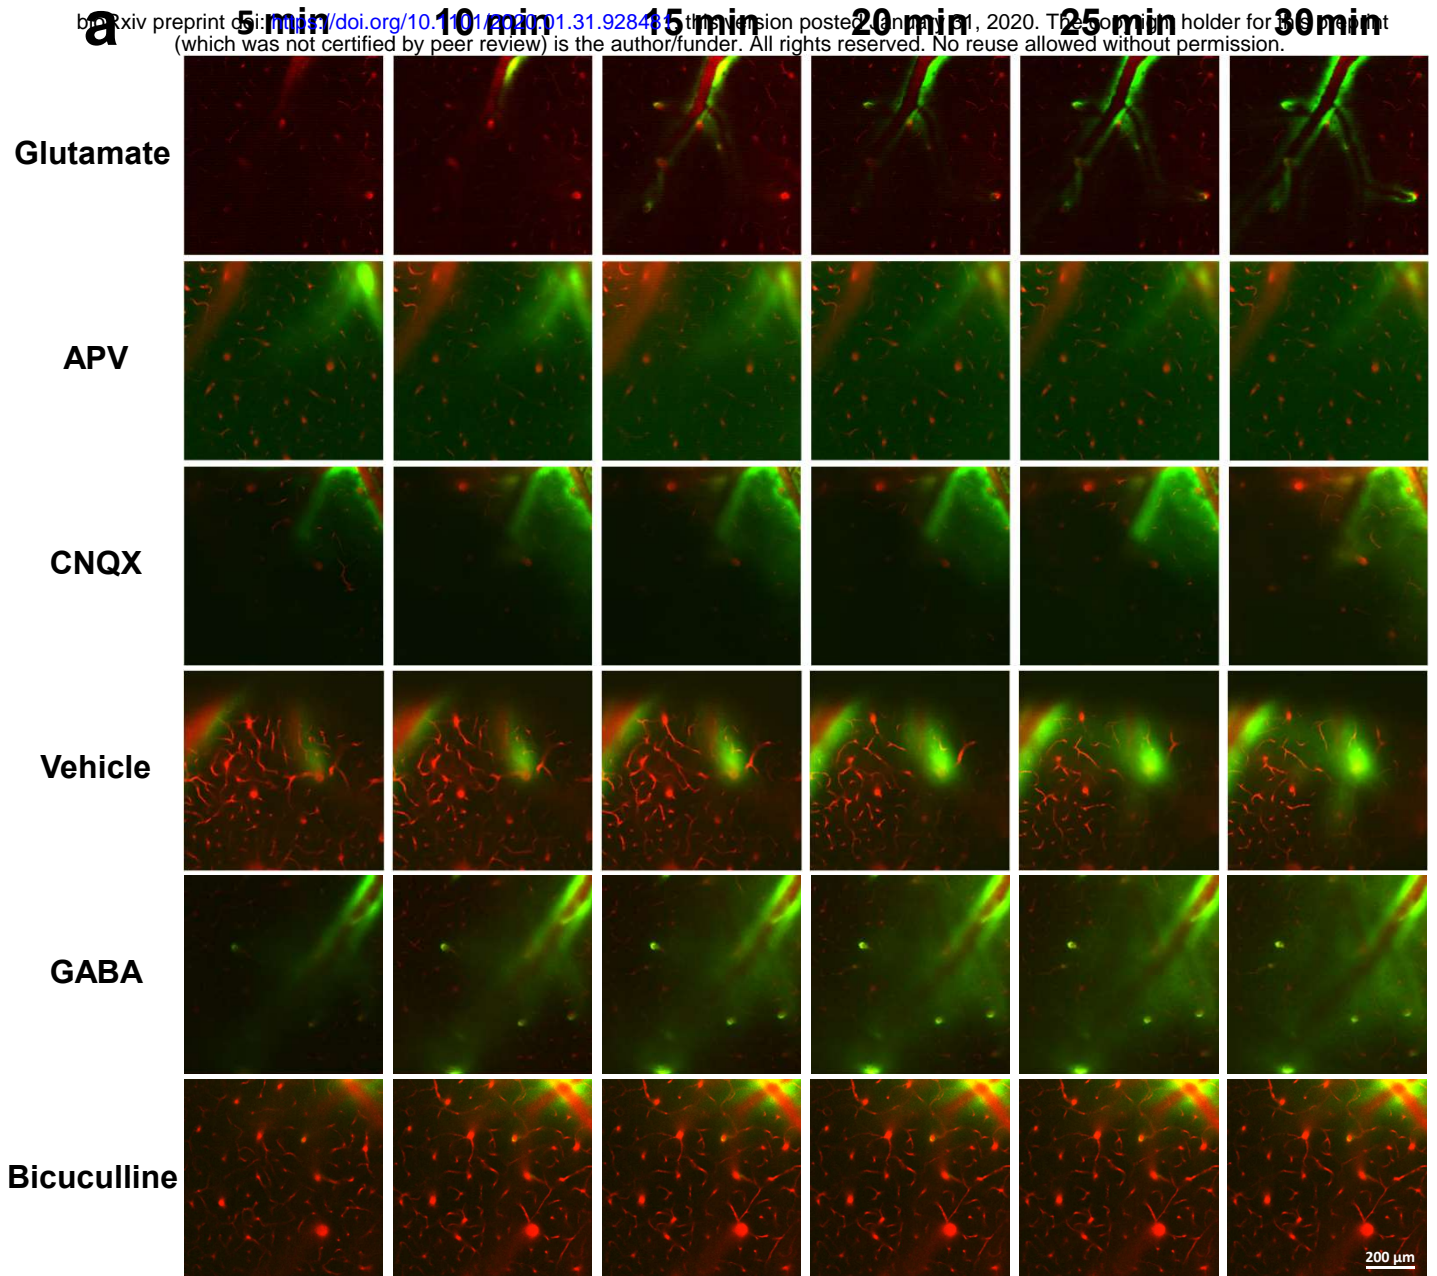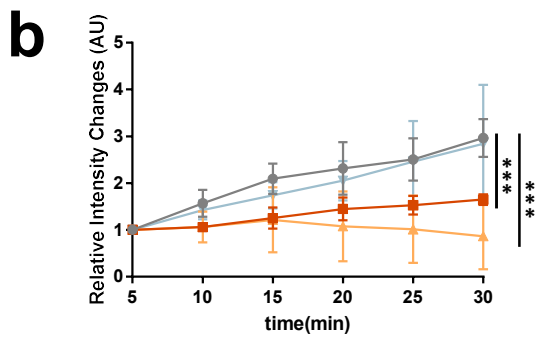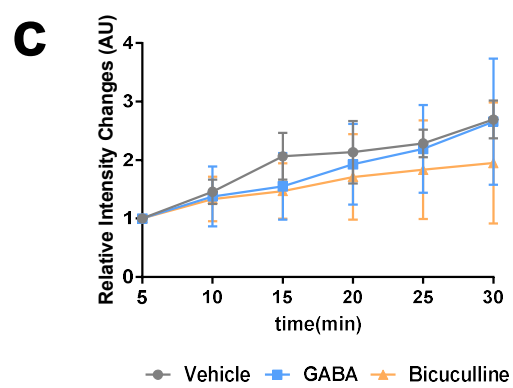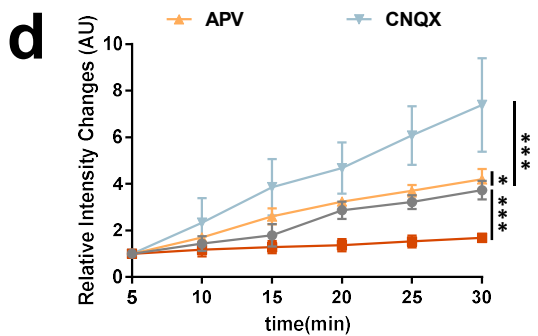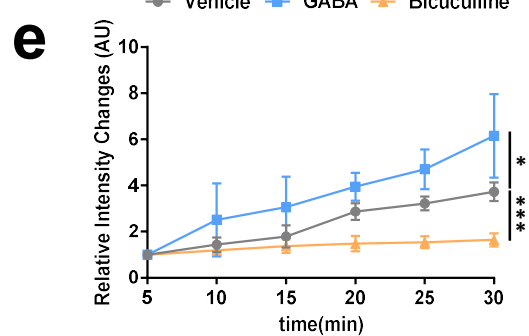

**Figure 3.**

bioRxiv preprint doi: <https://doi.org/10.1101/2020.05.30.026481>; this version posted January 21, 2021. The copyright holder for this preprint (which was not certified by peer review) is the author/funder. All rights reserved. No reuse allowed without permission.

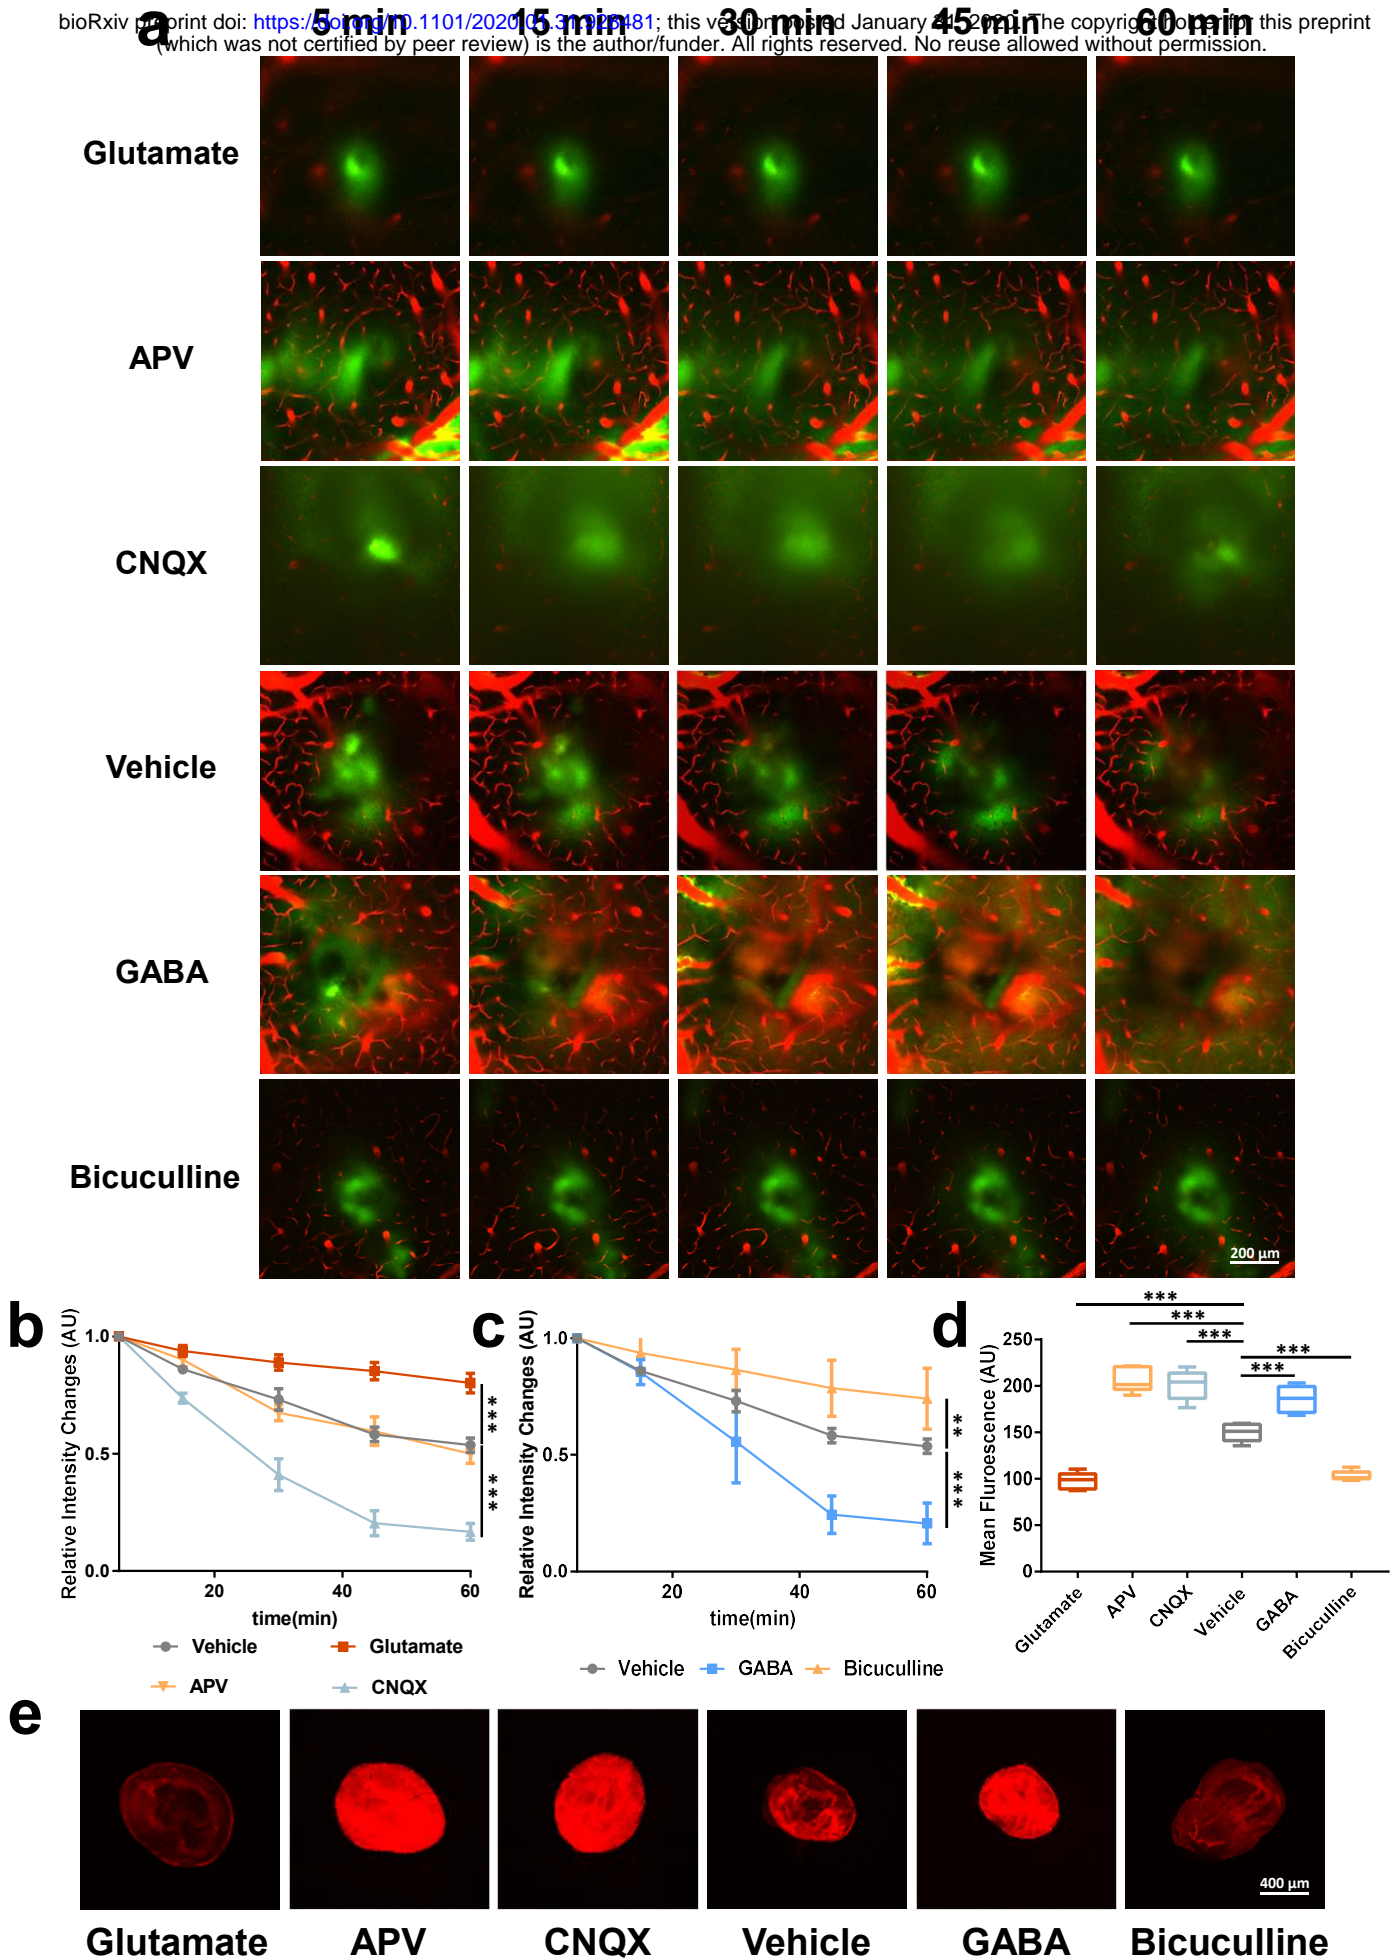

**Figure 4.**

bioRxiv preprint doi: <https://doi.org/10.1101/2020.01.31.928481>; this version posted February 11, 2020. The copyright holder for this preprint (which was not certified by peer review) is the author/funder, who has granted bioRxiv a license to display the preprint in perpetuity. It is made available under aCC-BY-NC-ND 4.0 International license.

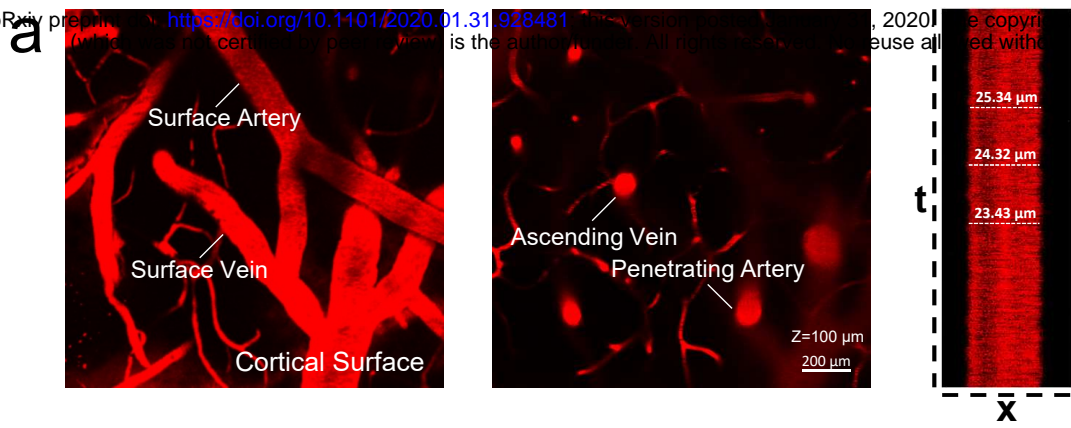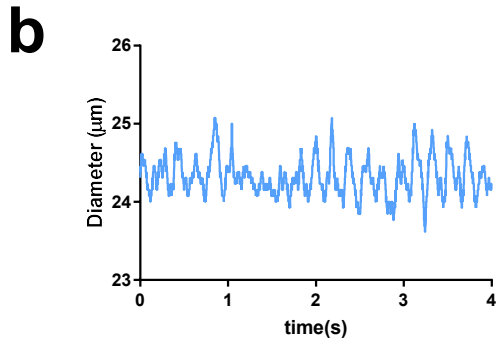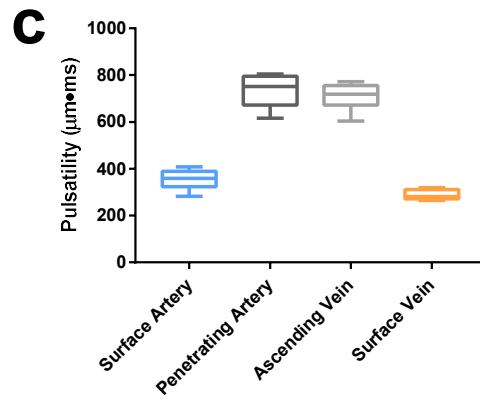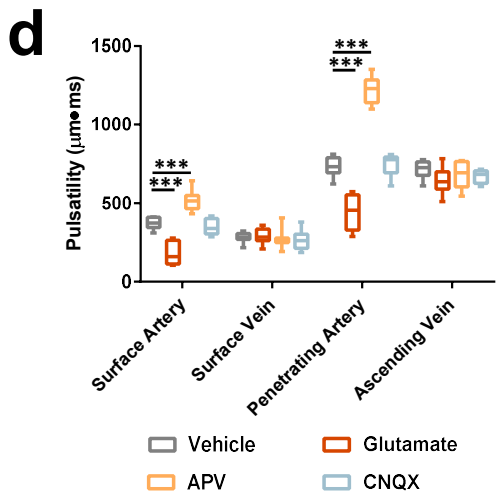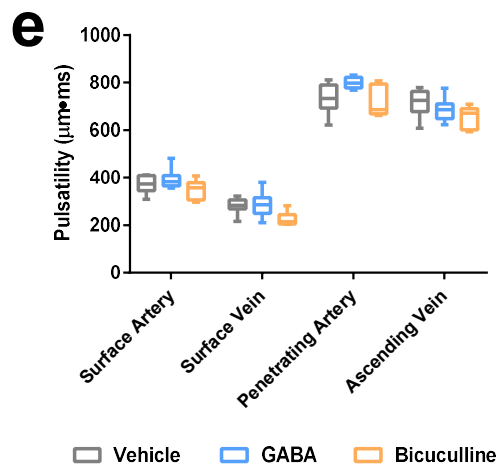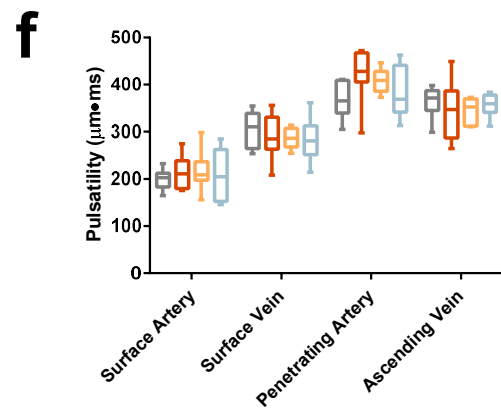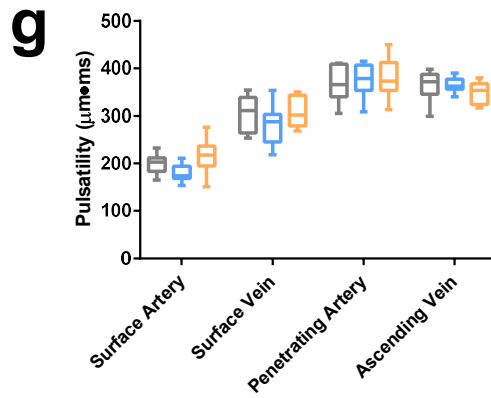

**Figure 5.**

**a** **5 min** **10 min** **15 min** **20 min** **25 min** **30 min**  
 bioRxiv preprint doi: <https://doi.org/10.1101/2020.07.01.31.928443>; this version posted July 1, 2020. The copyright holder for this preprint (which was not certified by peer review) is the author/funder. All rights reserved. No reuse allowed without permission.

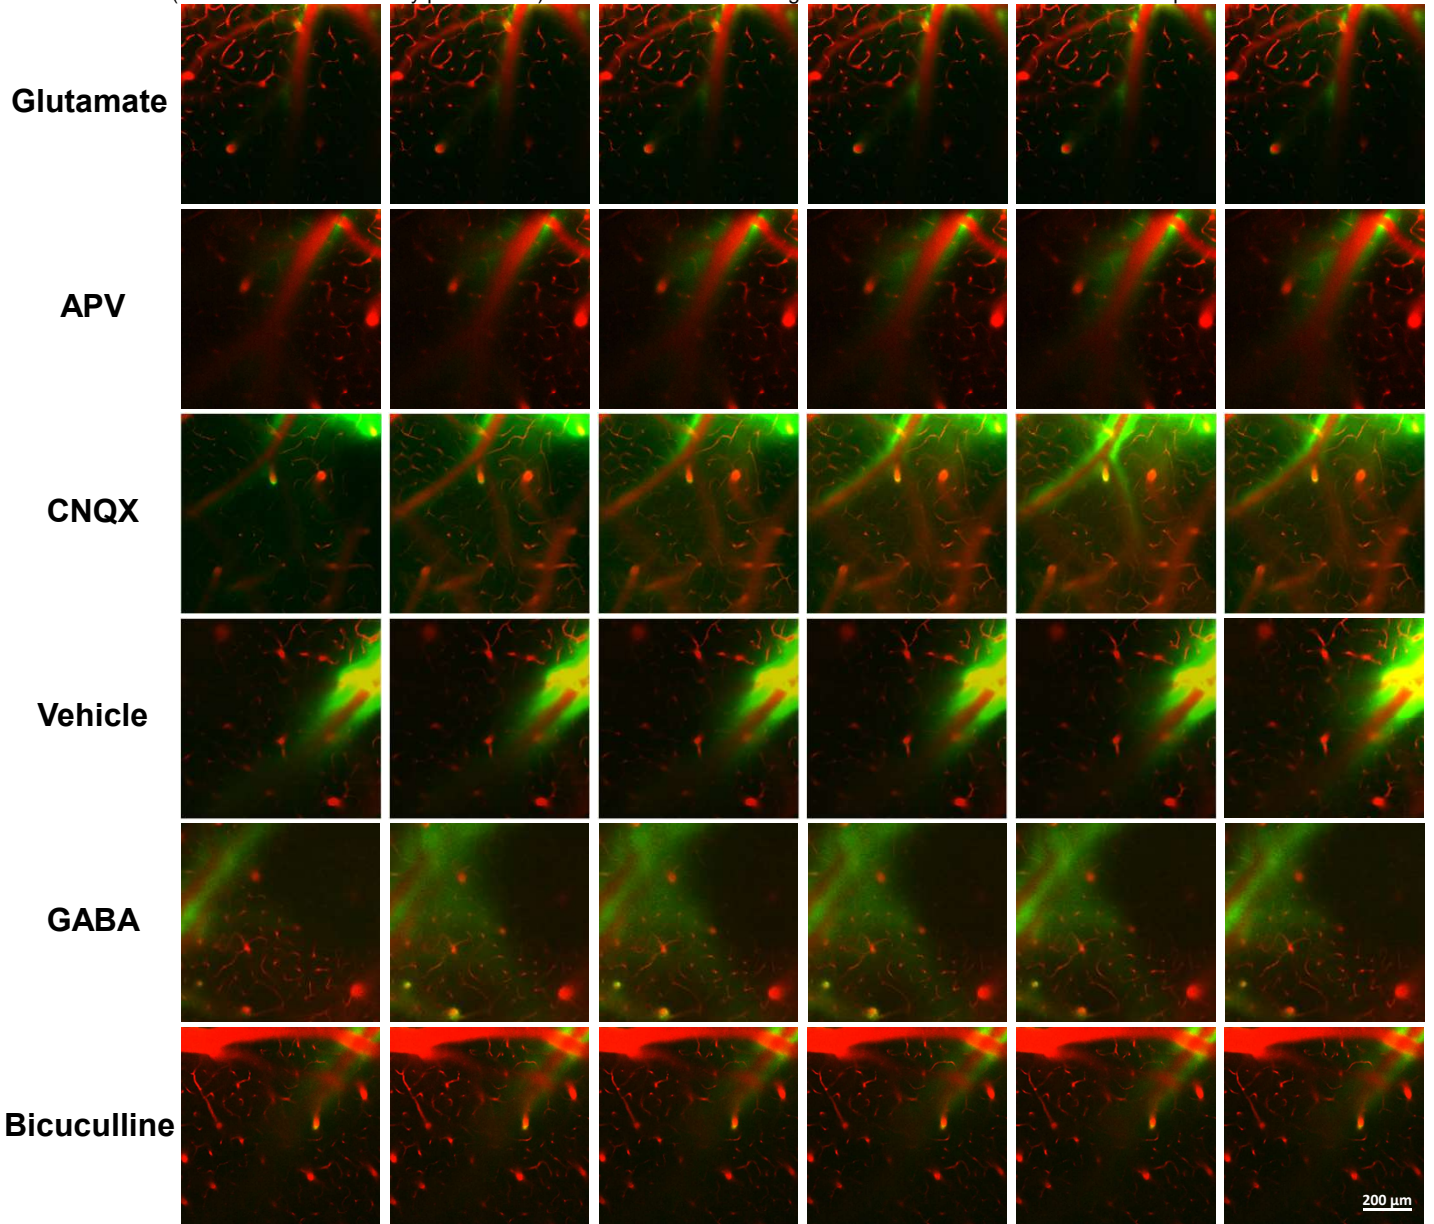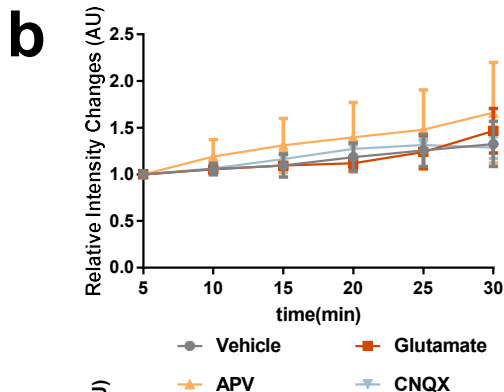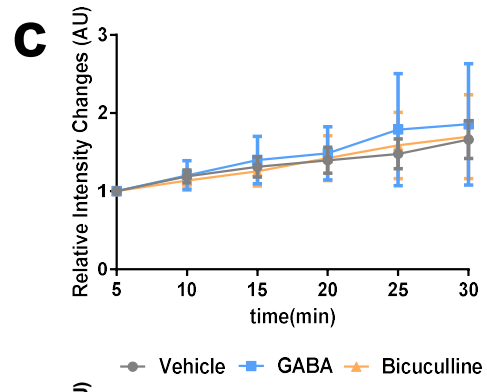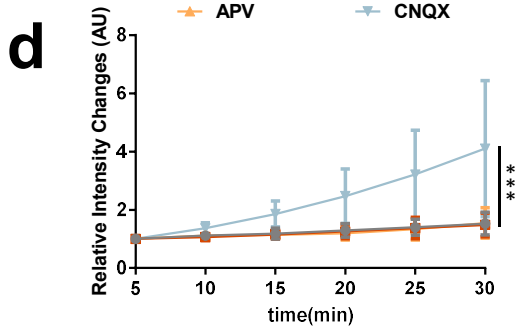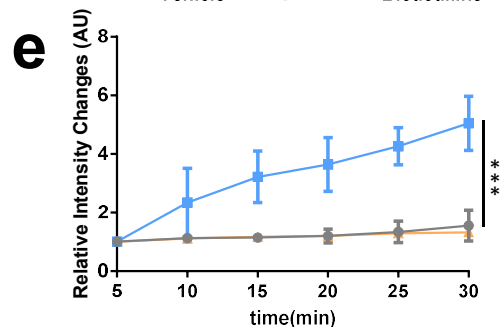

**Figure 6.**

**a** **5 min** **10 min** **15 min** **20 min** **25 min** **30 min**  
 bioRxiv preprint doi: <https://doi.org/10.1101/2020.01.31.928445>; this version posted March 11, 2020. The copyright holder for this preprint (which was not certified by peer review) is the author/funder. All rights reserved. No reuse allowed without permission.

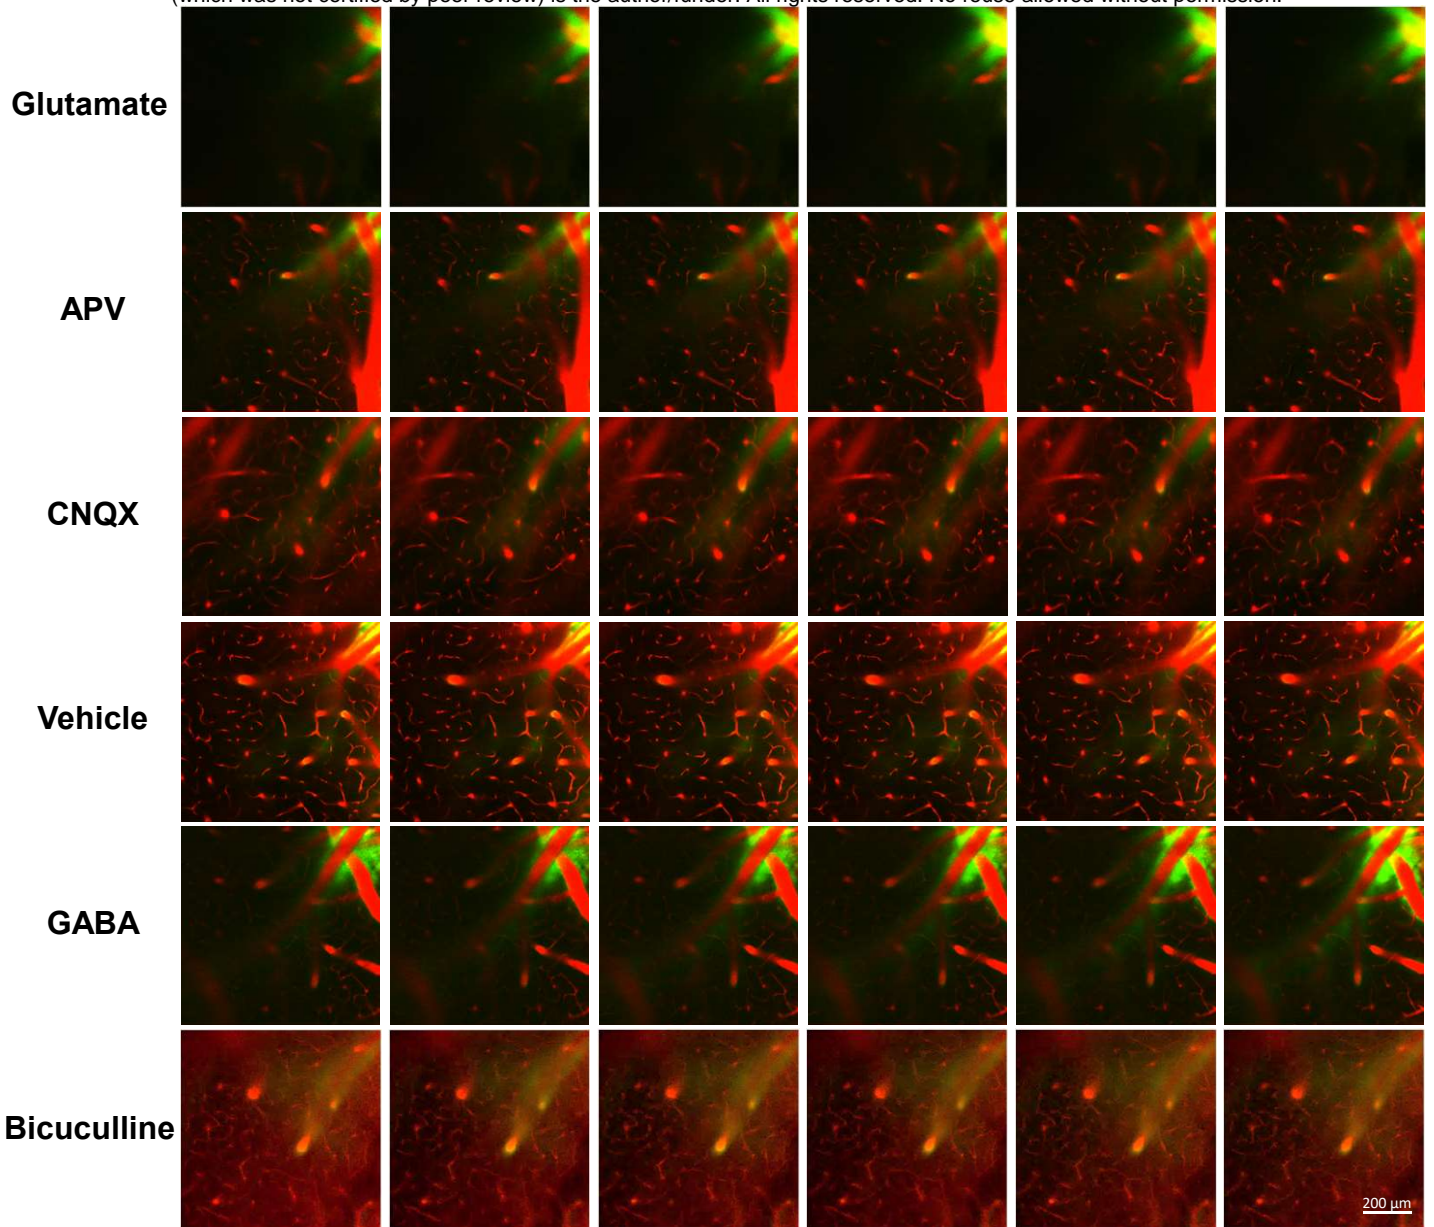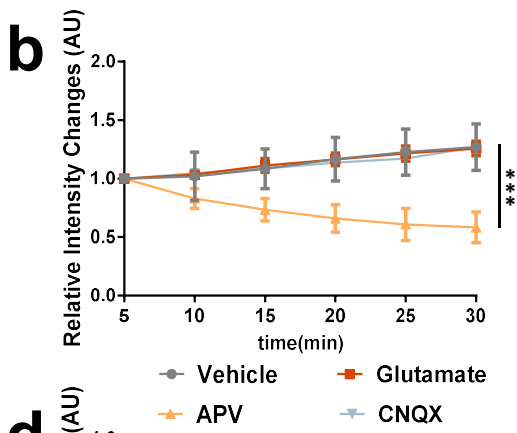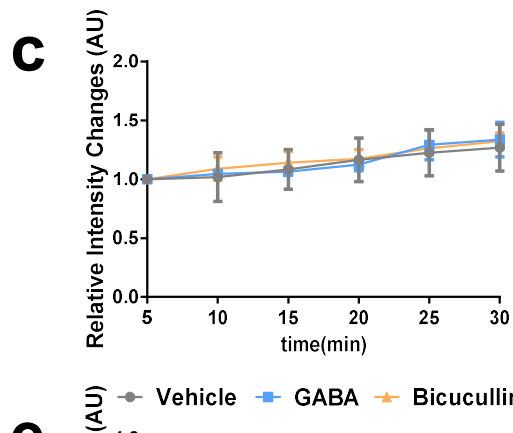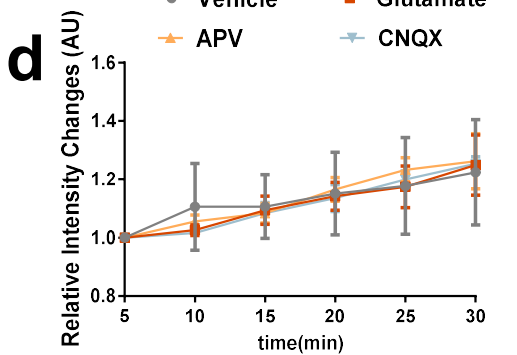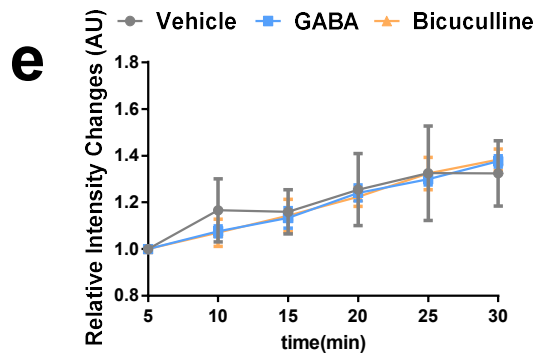

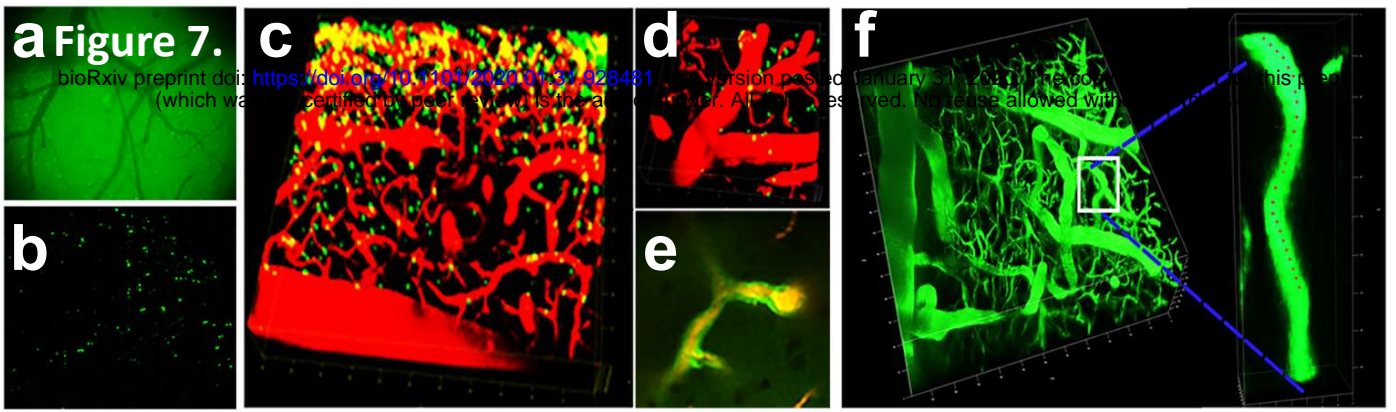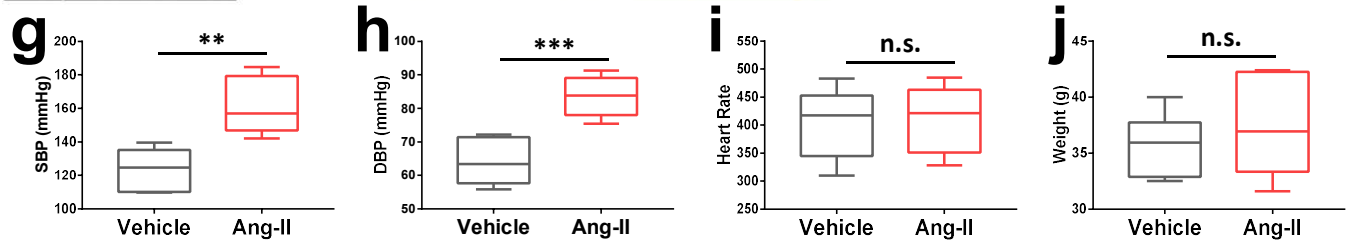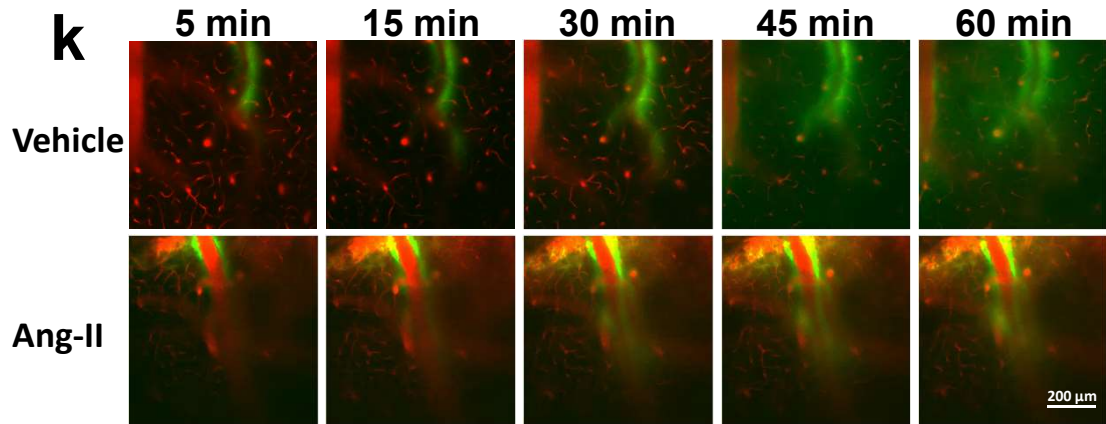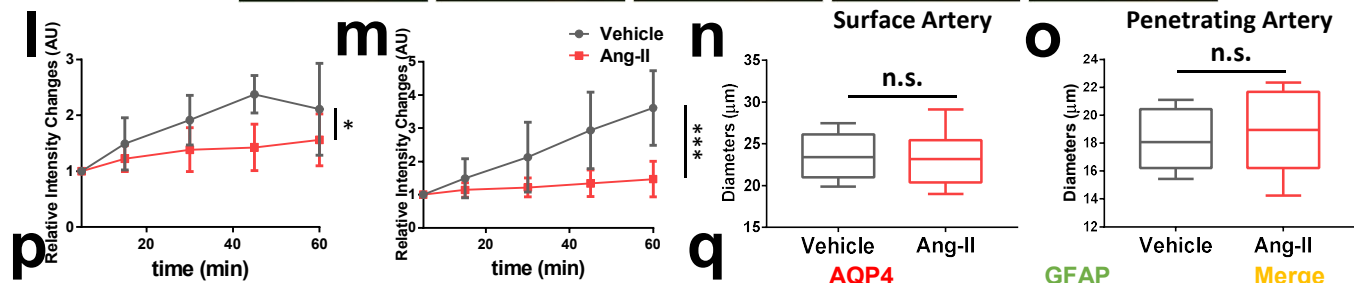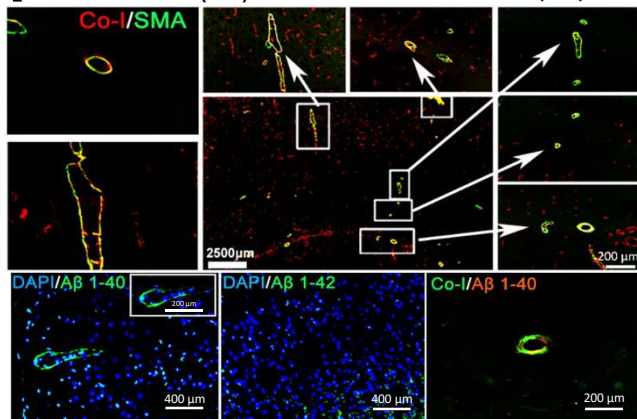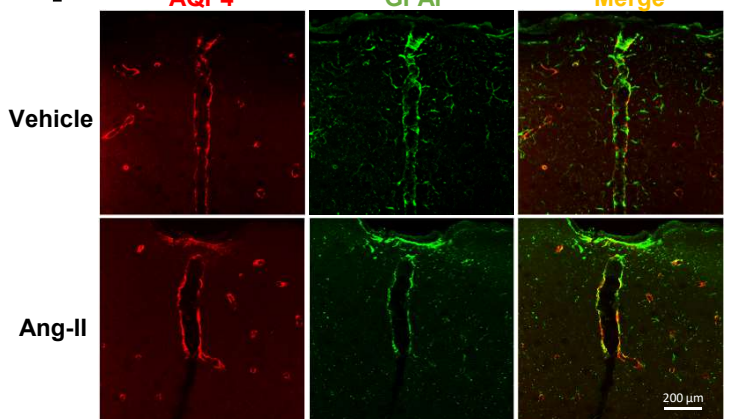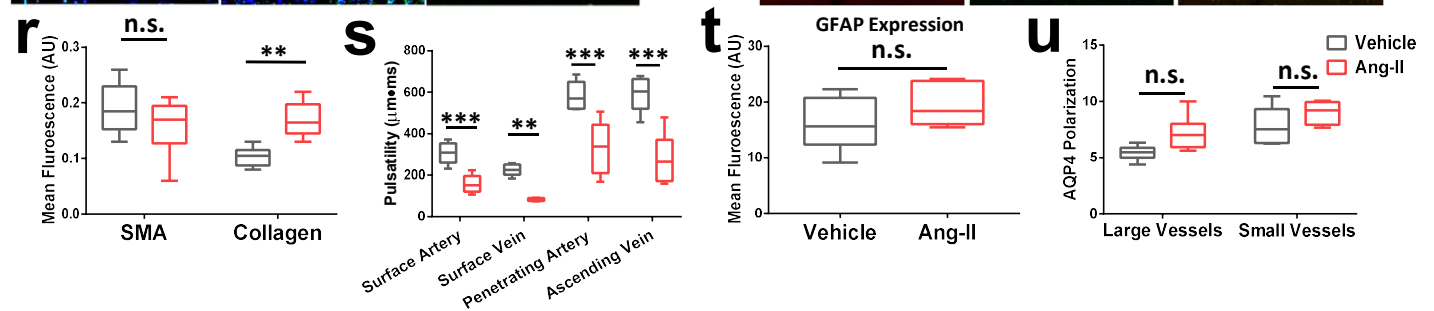

# a Figure 8.

bioRxiv preprint doi: <https://doi.org/10.1101/2020.04.01.926481>; this version posted January 30, 2020. The copyright holder for this preprint (which was not certified by peer review) is the author/funder, who has granted bioRxiv a license to display the preprint in perpetuity. It is made available under aCC-BY-NC-ND 4.0 International license.

# b

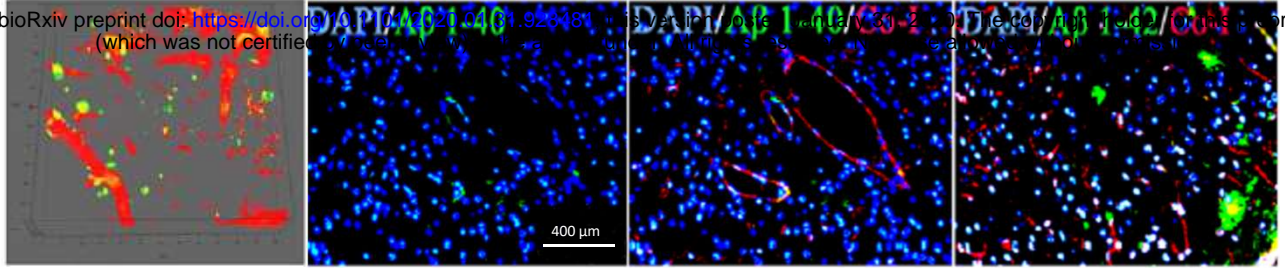

# c

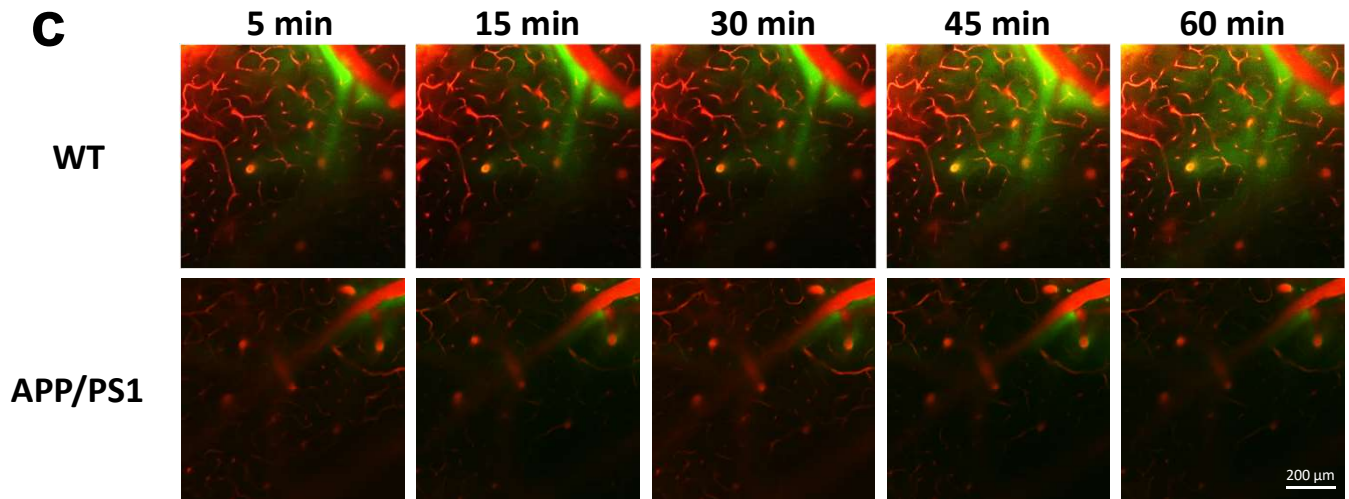

# d

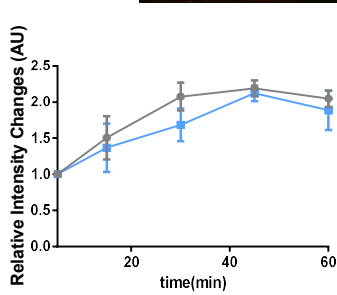

# e

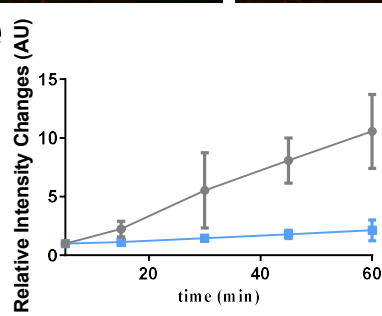

# f

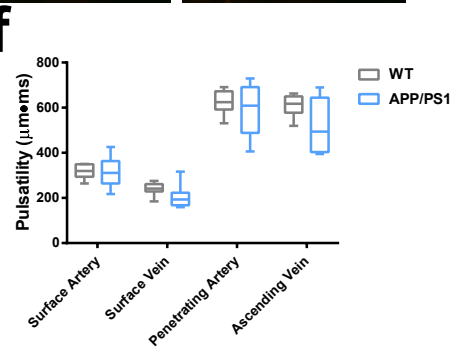

# g

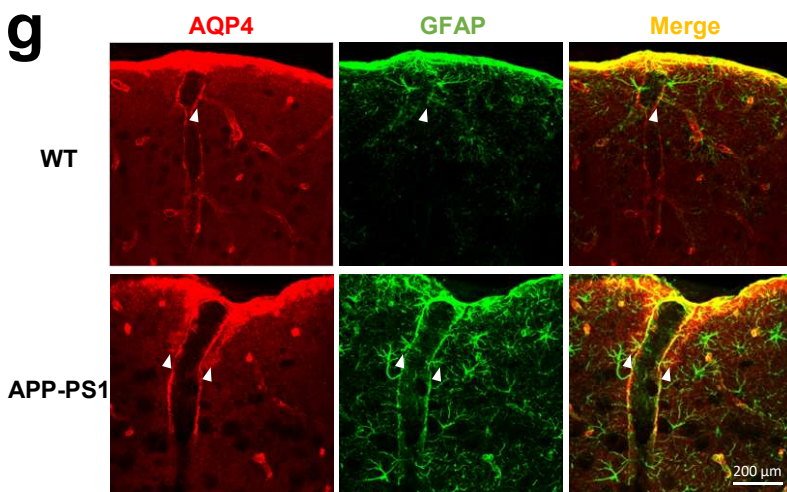

# h

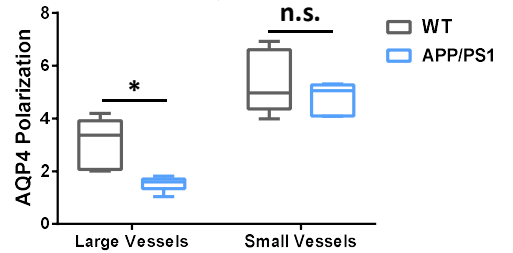

# i

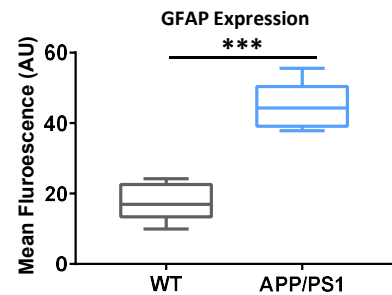



# Figure 9.

bioRxiv preprint doi: <https://doi.org/10.1101/2020.01.31.928481>; this version posted January 31, 2020. The copyright holder for this preprint (which was not certified by peer review) is the author/funder. All rights reserved. No reuse allowed without permission.

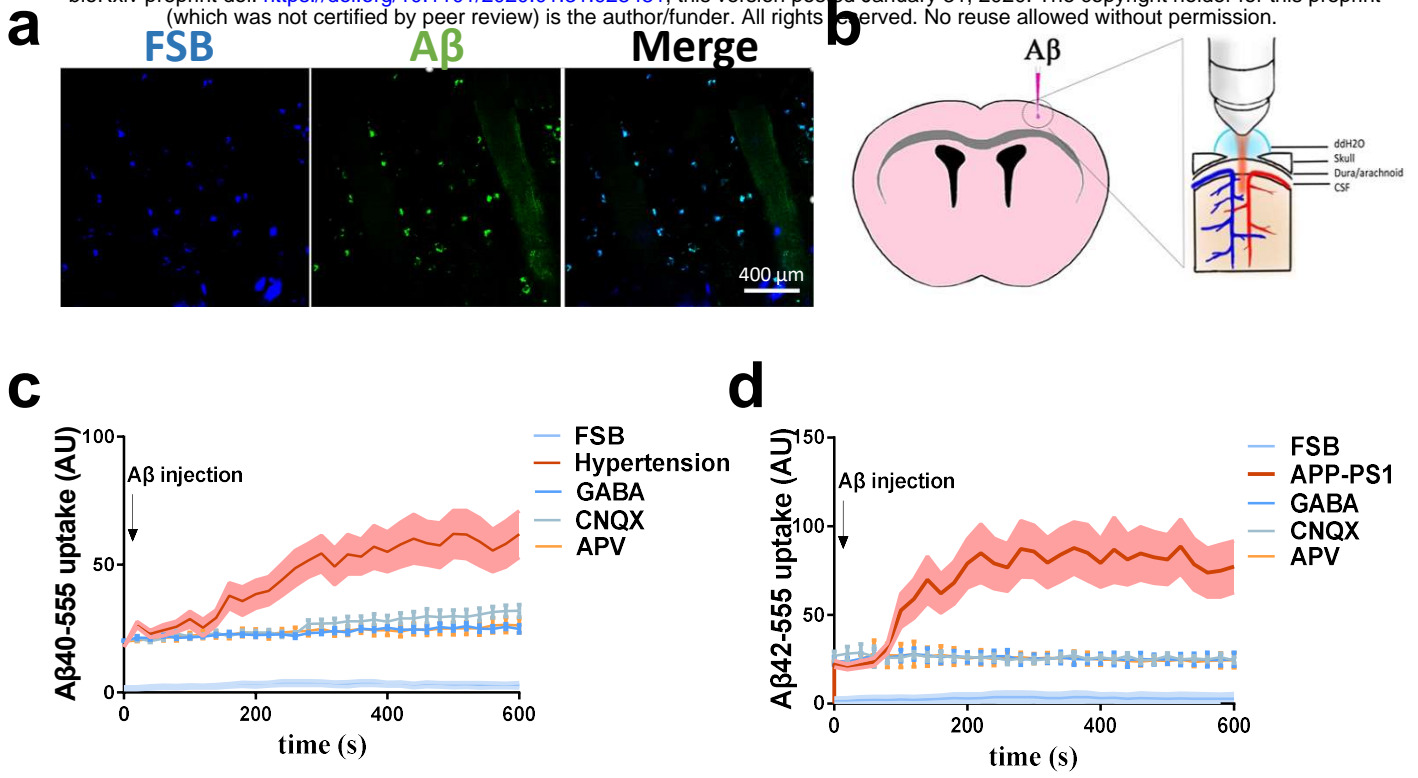

Source: https://www.biorxiv.org/content/10.1101/2020.01.31.928481v1.full.pdf
